# Supplementary material
Source: publisher figshare collection journal article supplement (https://brill.figshare.com/ndownloader/files/40298788)
Supplement: Supplementary file 1 [file 40298788]

## Sheet: Journal Article Only
Year	Authors	Title	Journal	DOI	Cites	Author Count	Abstract	Keywords	Type of study: (Lab Experiment, Field experiment, Field survey, Literature review, Opinion paper)	Number of nematodes identified by Walter (from M&M if available)	When available, Total number of species reported (if available from M&M or Results)	When available, dominant Nematode species in the ecosystem(s)/microcosm(s) surveyed, or main species used for experimental work (if several species no problem, just write them like "Eumonhystera_vulgaris" separated by semicolons plz..)	Country/countries (if field experiment or field survey)	FullTextURL
1993	H. Schäfer, A. Wenzel, U. Fritsche, G. Röderer, W. Traunspurger	Long-term effects of selected xenobiotica on freshwater green algae: development of a flow-through test system	Science of The Total Environment	10.1016/s0048-9697(05)80077-4	8	5	To be able to test the long-term effects of xenobiotica on freshwater algae, a flow-through test system was developed and optimized. This system allows the testing of volatile and unstable substances, which is problematic in static test systems. The effects of different chemical compounds were tested using growth of Chlamydomonas reinhardi as criterion. From the results the following order with i…	Green algae; flow-through system; Chlamydomonas reinhardi; Toxicity; atrazine; copper sulphate; cadmium chloride; pentachlorophenol; 3,4-dichloroaniline; lindane; methyl parathion; 1,2-dichloropropane	Lab experiment					https://api.elsevier.com/content/article/PII:S0048969705800774
1994	Armin Remde, Walter Traunspurger	A method to assess the toxicity of pollutants on anaerobic microbial degradation activity in sediments	Environmental Toxicology and Water Quality	10.1002/tox.2530090407	9	2	A method to assess the impact of toxicants on the actual anaerobic microbial degradation activity in sediments is described. Under conditions closely related to in situ, the influence of isoproturon and three of its known metabolites on the actual carbon dioxide release rate and the actual methane production rate was determined. For isoproturon only a slight inhibition ( < 10%) of the methane pro…	Microbial degradation; Sediment; Isoproturon; CO2 release rate; Methanogenesis	Lab experiment					https://api.wiley.com/onlinelibrary/tdm/v1/articles/10.1002%2Ftox.2530090407
1994	Kerstin Hund, Walter Traunspurger	Ecotox-evaluation strategy for soil bioremediation exemplified for a PAH-contaminated site	Chemosphere	10.1016/0045-6535(94)90111-2	60	2	During a bioremediation of a PAH-contaminated site chemical and biological analyses were carried out. The biological investigations included ecotoxicological analyses in the aqueous extract, (Pseudomonas putida, Photobacterium phosphoreum, daphnids, algae, fish) and analyses in the soil with introduced organisms (plants, earthworms) and natural soil organisms (nematodes, microorganisms). In all t…	Soil; PAH; remediation; toxicity tests; algae; daphnia; fish; nematodes; earthworms; plants; microorganisms	Lab experiment; field experiment				Germany	https://api.elsevier.com/content/article/PII:0045653594901112
1995	W. Traunspurger	Autecology of Rhabdolaimus Terrestris De Man- a Dominant Freshwater Nematode in an Oligotrophic Lake	Nematologica	10.1163/003925995x00549	7	1	Despite the high abundance and number of species of nematodes in aquatic ecosystems the autecology of free-living freshwater nematodes is relatively unknown. Rhabdolaimus terrestris was the dominant of 120 examined species in Lake Königssee, with high abundance in the littoral of the lake. Thirty-seven percent and 56% of all R. terrestris were found in 2 m and 5 m water depth, respectively. The p…	Nematoda; ecology; benthos; Königssee; morphometry; seasonal	Field survey	22899		Rhabdolaimus_terrestris	Germany	https://brill.com/view/journals/nema/41/1-4/article-p603_54.xml
1996	Walter Traunspurger	Autecology ofMonhystera paludicola De Man, 1880 – Seasonal, Bathymetric and Vertical Distribution of a Free-living Nematode in an Oligotrophic Lake	Internationale Revue der gesamten Hydrobiologie und Hydrographie	10.1002/iroh.19960810205	4	1	The autecology of Monhystera paludicola (n = 3766 individuals), a dominant nematode of Lake Königssee, was studied throughout the year 1986. The species comprised 2341% of all nematodes in the littoriprofundal and profundal. Mean yearly biomass was highest at 10 m depth (149 pg/lOO cm2, fresh weight). Abundance peaked twice a year in the littoral (winter and summer) and once in deeper regions (wi…	nematoda; Monhystera; autecology; lake; distribution	Field survey	3766		Monhystera_paludicola	Germany	https://api.wiley.com/onlinelibrary/tdm/v1/articles/10.1002%2Firoh.19960810205
1996	Walter Traunspurger	Distribution of benthic nematodes in the littoriprofundal and profundal of an oligotrophic lake (Königssee, National Park Berchtesgaden, FRG)	Archiv für Hydrobiologie	10.1127/archiv-hydrobiol/135/1996/557	18	1	Although the nematodes are the most abundant and species richest organisms in the littoral and profundal of the benthos of lakes, little is known about their distribution and species composition. In this study, the spatial and temporal distribution of the nematode fauna of an alpine, oligotrophic lake was studied over a one-year period. In the littoriprofundal and profundal of Königssee, nematode…	bathymetric; nematodes; littoriprofundal; epistrate feeders; alpine; Königsee; Germany	Field survey		71	Monhystera_paludicola; Eumonhystera_filiformis	Germany
1996	Walter Traunspurger, Carlos Drews	Vertical distribution of benthic nematodes in an oligotrophic lake: seasonality, species and age segregation	Hydrobiologia	10.1007/bf00025405	19	2	The vertical distribution of nematodes up to 20 cm sediment depth was studied over a one-year period in the alpine, oligotrophic lake Königssee. Ten water depths were examined, four of which correspond to the littoral (1 m, 2 m, 5 m, 10 m), three to the littoriprofundal (15 m, 20 m, 30 m) and three to the profundal (60 m, 120 m, 190 m). The sediment was devided into four layers (0–2 cm, 2–5 cm, 5…	nematoda; ecology; stratification; bathymetry; sediment; Konigssee	Field survey	45 263	116	Rhabdolaimus_terrestris	Germany	http://link.springer.com/content/pdf/10.1007/BF00025405.pdf
1996	Walter Traunspurger	Distribution of benthic nematodes in the littoral of an oligotrophic lake (Königssee, National Park Berchtesgaden, FRG)	Archiv für Hydrobiologie	10.1127/archiv-hydrobiol/135/1996/393	32	1	Although nematodes are the most abundant and species richest organisms in the benthos of aquatic ecosystems, little is known about their seasonal, bathymetrical and vertical distribution in lakes. In this study, the spatial and temporal distribution of the nematode fauna of an alpine, oligotrophic lake was studied over a one-year period. In the littoral of Königssee, nematodes comprise 78 % of th…	benthos; alpine; bathymetrical; nematodes; Rhabdolaimus terrestris; fauna; Königsee; Germany	Field survey		90	Rhabdolaimus_terrestris; Monhystera_paludicola	Germany
1996	W. Traunspurger, H. Schäfer, A. Remde	Comparative investigation on the effect of a herbicide on aquatic organisms in single species tests and aquatic microcosms	Chemosphere	10.1016/0045-6535(96)00252-4	21	3	In the present investigation the effect of the herbicide isoproturon on freshwater and sediment organisms was comparatively investigated in single species tests and a microcosm study. In single species tests the photosynthesis inhibitor isoproturon atlbcted the growth rate of algae. For Chlamydomonas rheinhardi the ECSO, i.e. the concentration, where the growth rate is inhibited to 50 %, was obse…	Toxicity tests; microcosms; Daphnia; algae; Caenorhabditis elegans; nematodes; microbial degradation activity; isoproturon	Lab experiment			Celegans		https://api.elsevier.com/content/article/PII:0045653596002524
1996	Walter Traunspurger, Carlos Drews	Toxicity analysis of freshwater and marine sediments with meio- and macrobenthic organisms: a review	Hydrobiologia	10.1007/bf00017632	71	2	Benthic metazoans play a key role as test organisms in toxicity analyses of aquatic ecosystems . This report gives an overview of the species of benthic metazoans used for the assessment of toxicity in freshwater and marine sediments, as well as of the criteria relevant to the choice between test species and procedures . The main applications of these organisms are mono-species bioassays, test-ba…	review, ecotoxicology, pollution, bioassay, benthos	Literature review					http://link.springer.com/content/pdf/10.1007/BF00017632.pdf
1997	H. Schreiber, D. Schoenen, W. Traunspurger	Invertebrate colonization of granular activated carbon filters	Water Research	10.1016/s0043-1354(96)00312-0	40	3	Results of biological sampling of granular activated carbon (GAC) filtrate taken between May 1994 and August 1995 at three different treatment plants along the river Rhine indicate that GAC filters are colonized by invertebrates. Dominating organism groups were rotifers and nematodes. Depending on operational characteristics, mainly regeneration intervals and backwashing procedures, the filter co…	drinking water; invertebrates; biological filtration; GAC	Field experiment				Germany	https://api.elsevier.com/content/article/PII:S0043135496003120
1997	Walter Traunspurger	Distribution, Seasonal Occurrence and Vertical Pattern of Tobrilus Gracilis (Bastian, 1865) and T. Medius (Schneider, 1916)	Nematologica	10.1163/004725997x00043	8	1	The autecology of Tobrilus gracilis (n = 1705 individuals) and T. medius (n = 298 indi- viduals), two common nematode species of Lake Königssee, was studied throughout the year 1986. T. gracilis comprised 3.5% of all nematodes in the littoral, 6.3% in the littoriprofundal and 2.7% in the profundal. T. medius comprised 0.3% of all nematodes in the littoral, 1.4% in the littoriprofundal and 3.3% in…	Nematoda; Tobrilus; benthos; autecology; lake Königssee; distribution	Field survey	2003		Tobrilus_gracilis; Tobrilus_medius	Germany	https://brill.com/view/journals/nema/43/1/article-p59_4.xml
1997	Heinrich Eisenmann, Walter Traunspurger, Elisabeth I. Meyer	A new device to extract sediment cages colonized by microfauna from coarse gravel river sediments	Archiv für Hydrobiologie	10.1127/archiv-hydrobiol/139/1997/547	11	3	A device was developed in order to extract semi-natural substrata, exposed in the coarse sediments of a prealpine river, the Necker (Switzerland). Cylindrical wire cages filled with pre-sieved sediment were placed in a perforated stainless steel tube, that had previously been buried in the sediment. The chambers were extracted by pushing plexiglass tubes down to their bottom, thus sealing them at…	substrate; porewater; sediment; prealpine; Necker; Switzerland	Field survey			Eumonhystera	Switzerland
1997	Walter Traunspurger, Markus Haitzer, Sebastian Höss, Stefanie Beier, Wolfgang Ahlf, Christian Steinberg	Ecotoxicological assessment of aquatic sediments with Caenorhabditis elegans (nematoda) - a method for testing liquid medium and whole-sediment samples	Environmental Toxicology and Chemistry	10.1002/etc.5620160221	8	6	We present a method using the free-living nematode Caenorhabditis elegans (Maupas, 1899) to assess toxicity in liquid medium and whole-sediment setups. Test duration is 72 h; endpoints are body length, number of eggs inside worms, percentage of gravid worms, and number of offspring per worm. The effect of CdCl2 on C. elegans in liquid-phase exposures is described as an example. Results from a fie…	Nematoda; Caenorhabditis elegans; Ecotoxicology; Sediment Bioassay	Lab experiment			Celegans		https://api.wiley.com/onlinelibrary/tdm/v1/articles/10.1002%2Fetc.5620160221
1997	S. Höss, M. Haitzer, W. Traunspurger, H. Gratzer, W. Ahlf, C. Steinberg	Influence of particle size distribution and content of organic matter on the toxicity of copper in sediment bioassays using Caenorhabditis elegans (Nematoda)	Water Air and Soil Pollution	10.1007/bf02406908	1	6	The influence of parlicle size distribution and organic matter on the toxicity of copper was investi-gated using the nematode Caenorhabditis elegans as testorganism. Sedimens taken at various depths from three lakes of different trophic status and artificial sediments were spiked with sublethal concentrations of CuSO4. After an exposure of 72 h to spiked sediment or liquid medium, body length of …	sediment; particle size distribution; organic matter; Caenorhabditis elegans; Cu; toxicity	Lab experiment			Celegans		http://link.springer.com/content/pdf/10.1007/BF02406908.pdf
1997	Walter Traunspurger, Matthias Bergtold, Willem Goedkoop	The effects of nematodes on bacterial activity and abundance in a freshwater sediment	Oecologia	10.1007/s004420050291	96	3	The effects of natural nematode communities on bacterial activity and abundance were investigated in a microcosm study. Nematodes were added at different densities to a freshwater sediment and bacterial parameters were measured after 1, 5, 9, and 17 days. Significant effects of nematode density on bacterial activity were noted on day 5. No long-term changes in bacterial activity were recorded. Ba…	Nematoda; Freshwater sediment; Microcosms; Bacterial activity	Lab experiment					http://link.springer.com/content/pdf/10.1007/s004420050291.pdf
1997	Walter Traunspuger	Bathymetric, seasonal and vertical distribution of feeding-types of nematodes in an oligotrophic lake	Vie et Milieu		131		Although nematodes are the most common organism group in freshwater meiobenthos, little is known about their role in the trophic webs of lentic Systems. In this report the bathymetrie, seasonal and vertical distribution of four feeding-types of nematodes in the oligotrophic, alpine lake Königssee are described. Deposit-feeders predominate at ail depths, followed by epistrate-feeders, chewers and …	Nematoda; Feeding-types; Königsee; Benthos; Trophic web	Field survey
1998	Walter Traunspurger	Distribution and Sex Ratio of Ethmolaimus Pratensis De Man, 1880 (Nematoda, Chromadorida) in an Oligotrophic Lake	Nematologica	10.1163/005525998x00061	4	1	The distribution of Ethmolaimus pratensis (n = 1627 individuals), a common nematode species of Königssee, was studied throughout 1986. E. pratensis comprised 3.5% of all nematodes in the littoral, 3.1% in the littoriprofundal and 5.5% in the profundal. The species contributed to a consid_x0002_erable portion of nematode biomass in Königssee with mean annual biomass being highest at 1 m depth (0.1…	autecology; biomass; depth distribution; Königssee; populations; seasonal change	Field survey	1627		Ethmolaimus_pratensis	Germany	https://brill.com/view/journals/nema/44/4/article-p391_6.xml
1998	M. Pusch, D. Fiebig, I. Brettar, H. Eisenmann, B. K. Ellis, L. A. Kaplan, M. A. Lock, M. W. Naegeli, W. Traunspurger	The role of micro‐organisms in the ecological connectivity of running waters	Freshwater Biology	10.1046/j.1365-2427.1998.00372.x	171	9	Riparian zones hold a central place in the hydrological cycle, owing to the prevalence of surface and groundwater interactions. In riparian transition zones, the quality of exfiltrating water is heavily influenced by microbial activities within the bed sediments. This paper reviews the role of micro-organisms in biogeochemical cycling in the riparian-hyporheic ecotone. The production of organic s…	Ecosystems; microbial ecology; organic matter; riparian rivers	Literature review					https://onlinelibrary.wiley.com/doi/pdf/10.1046/j.1365-2427.1998.00372.x
1998	Markus Haitzer, Sebastian Höss, Walter Traunspurger, Christian Steinberg	Effects of dissolved organic matter (DOM) on the bioconcentration of organic chemicals in aquatic organisms — a review —	Chemosphere	10.1016/s0045-6535(98)00117-9	218	4	Current knowledge on the effects of dissolved organic matter (DOM) on the bioconcentration of organic chemicals in aquatic animals (water fleas, mussels, amphipods and fish) is summarized. A graphical representation of the available data gives an overview of the magnitude of the observed effects. Most of the studies have shown decreases in bioconcentration in the presence of DOM (2 to 98% relativ…	DOM; humic substances; bioconcentration; bioavailability; organic chemical;, aquatic organism	Literature review					https://api.elsevier.com/content/article/PII:S0045653598001179
1999	Markus Haitzer, B. Kent Burnison, Sebastian Höss, Walter Traunspurger, Christian E. W. Steinberg	Effects of quantity, quality, and contact time of dissolved organic matter on bioconcentration of benzo[a]pyrene in the nematode Caenorhabditis elegans	Environmental Toxicology and Chemistry	10.1002/etc.5620180314	31	5	Quantity and quality of dissolved organic matter (DOM) and the time allowed for DOM to interact with organic contaminants can influence their bioavailability. We studied the effect of natural aquatic DOM that had been in contact with benzo[a]pyrene (B[a]P) for 1 to 12 d on the bioconcentration of B[a]P in the nematode Caenorhabditis elegans. Dissolved organic matter quality and quantity was varie…	Dissolved organic matter; Caenorhabditis elegans; Polycyclic aromatic hydrocarbons; Bioconcentration; Contact time	Lab experiment			Celegans		https://api.wiley.com/onlinelibrary/tdm/v1/articles/10.1002%2Fetc.5620180314
1999	Markus Haitzer, Sebastian Höss, Walter Traunspurger, Christian Steinberg	Relationship between concentration of dissolved organic matter (DOM) and the effect of DOM on the bioconcentration of benzo[a]pyrene	Aquatic Toxicology	10.1016/s0166-445x(98)00097-6	52	4	Dissolved organic matter (DOM) from five different origins decreased the bioconcentration of benzo[a]pyrene (BaP) in the nematode, Caenorhabditis elegans. The decrease became more pronounced with increasing concentrations of DOM, but the effect per mg/l DOC was largest at low levels of DOM, indicating the lack of a simple direct relationship between DOM concentration and the bioconcentration fact…	DOM; PAH; Benzo[a]pyrene; Bioconcentration; Caenorhabditis elegans	Lab experiment			Celegans		https://api.elsevier.com/content/article/PII:S0166445X98000976
1999	Markus Haitzer, Gudrun Abbt-Braun, Walter Traunspurger, Christian E.W. Steinberg	Effects of humic substances on the bioconcentration of polycyclic aromatic hydrocarbons: Correlations with spectroscopic and chemical properties of humic substances	Environmental Toxicology and Chemistry	10.1002/etc.5620181219	48	4	The presence of dissolved humic substances (HS, fulvic and humic acids) generally reduces the uptake of hydrophobic organic compounds into aquatic organisms. The extent of this effect depends both on the concentration and on the origin of the HS. The aim of this study was to investigate the role of qualitative differences between HS from different origins. The effects of seven different HS on the…	Humic substances; Polycyclic aromatic hydrocarbons; Bioconcentration; Caenorhabditis elegans	Lab experiment			Celegans		https://api.wiley.com/onlinelibrary/tdm/v1/articles/10.1002%2Fetc.5620181219
1999	Sebastian Höss, Markus Haitzer, Walter Traunspurger, Christian E.W. Steinberg	Growth and fertility of Caenorhabditis elegans (nematoda) in unpolluted freshwater sediments: Response to particle size distribution and organic content	Environmental Toxicology and Chemistry	10.1002/etc.5620181238	41	4	The nematode Caenorhabditis elegans (Maupas) was exposed in a sediment bioassay to 26 different unpolluted freshwater sediments varying in particle size distribution (2.5–18% clay, 25.7–68.2% silt, 18.7–70.9% sand) and organic content (2.5–77.1%). We examined the variation of the test endpoints body length, eggs per worm, and percentage of gravid worms. Caenorhabditis elegans tolerated all invest…	Sediment; Particle size distribution; Organic content; Caenorhabditis elegans; Nematoda	Lab experiment			Celegans		https://api.wiley.com/onlinelibrary/tdm/v1/articles/10.1002%2Fetc.5620181238
2000	J. Fried, G. Mayr, H. Berger, W. Traunspurger, R. Psenner, H. Lemmer	Monitoring protozoa and metazoa biofilm communities for assessing wastewater quality impact and reactor up-scaling effects	Water Science and Technology	10.2166/wst.2000.0460	34	6	The succession of biofilm communities with special emphasis on ciliates, rotifers, and nematodes was monitored for half a year and compared to different operating conditions in order to evaluate plant performance and effect of up-scaling lab scale to large scale reactors. Ciliates and metazoa are able to rapidly change their communities as a reaction to changed plant operating conditions as has b…	Biofilm; ciliates; fixed bed reactor; nematodes; rotifers; wastewater quality	Field experiment				Germany	http://iwaponline.com/wst/article-pdf/41/4-5/309/427395/309.pdf
2000	Walter Traunspurger	The biology and ecology of lotic nematodes	Freshwater Biology	10.1046/j.1365-2427.2000.00585.x	76	1	Morphological structures for identifying freshwater nematodes, e.g. buccal cavity, sensory receptors, oesophagus, reproductive organs and tail are described. Most freshwater nematodes belong to the Adenophorea and are characterised by the presence of setae, adhesive glands and conspicuous amphids. Methods for collecting nematodes from the sediments of running water (e.g. corer, pumps), within pla…	Freshwater; meiofauna; Nematoda; streams	Literature review					https://onlinelibrary.wiley.com/doi/pdf/10.1046/j.1365-2427.2000.00585.x
2001	Stefanie Beier, Walter Traunspurger	The meiofauna community of two small German streams as indicators of pollution	Journal of Aquatic Ecosystem Stress and Recovery				In order to validate the results of biomarker studies as tools for the assessment of small streams, the meiofauna community and in particular the nematodes of two small German streams (Baden-Württemberg) were analysed during 1998. One site of Krähenbach (AB) and three sites of Körsch (KA, KD, KE) were sampled in March, May, July and November. The limnological analysis indicates that two sites of …	Community; Meiofauna; communities; indicators; pollution; streams	Field survey	2400	158	Eumonhystera_vulgaris; Eumonhystera_filiformis; Eumonhystera_simplex; Semitobrilus_pellucidus;	Germany
2001	Sebastian Höss, Matthias Bergtold, Markus Haitzer, Walter Traunspurger, Christian E.W. Steinberg	Refractory dissolved organic matter can influence the reproduction of Caenorhabditis elegans (Nematoda)	Freshwater Biology	10.1046/j.1365-2427.2001.00639.x	51	5	1. We investigated the effect of refractory dissolved organic matter (refractory DOM: fulvic acids (FAs) and ultrafiltrates (UFs)), isolated from five different sources, on the reproduction of the bacterivorous nematode Caenorhabditis elegans. Nematodes were exposed to DOM (0.5–64 mg L−1 dissolved organic carbon) during a whole life cycle (72 h). At the end of the test, the number of offspring pe…	Caenorhabditis elegans; fulvic acids; nematoda; refractory DOM; reproduction; ultrafiltrate	Lab experiment			Celegans		https://api.wiley.com/onlinelibrary/tdm/v1/articles/10.1046%2Fj.1365-2427.2001.00639.x
2001	Sebastian Höss, Thomas Henschel, Markus Haitzer, Walter Traunspurger, Christian E. W. Steinberg	Toxicity of cadmium to Caenorhabditis elegans (Nematoda) in whole sediment and pore water - the ambiguous role of organic matter	Environmental Toxicology and Chemistry	10.1002/etc.5620201219	3	5	A bioassay using the nematode Caenorhabditis elegans was performed with natural sediment that had been spiked with organic matter (36–117 g total organic carbon/kg dry wt) and cadmium (Cd; 10–1,200 mg/kg wet wt). Whole sediment and pore water were tested to study the influence of particulate organic matter (POM) and dissolved organic matter (DOM) on Cd toxicity and to compare the toxicity of the …	Caenorhabditis elegans; Sediment; Pore water; Cadmium; Organic matter	Lab experiment			Celegans		https://api.wiley.com/onlinelibrary/tdm/v1/articles/10.1002%2Fetc.5620201219
2002	Martina Duft, Katharina Fittkau, Walter Traunspurger, Sepp Fittkau	Colonization of Exclosures in a Costa Rican Stream: Effects of Macrobenthos on Meiobenthos and the Nematode Community	Journal of Freshwater Ecology	10.1080/02705060.2002.9663931	5	4	Interactions of macro- on meiobenthos were studied in the sediment of a small stream in northwestern Costa Rica. Three different exclosure types (n = 5) were exposed for 21 days: (1) treatment macrofauna (2 mm mesh size) allowed meiobenthic plus macrobenthic colonization; (2) treatment meiofauna (500 μm mesh size) allowed meiobenthic colonization but reduced macrobenthic colonization; and (3) pla…		Field experiment		31	Eumonhystera	Costa Rica	http://www.tandfonline.com/doi/pdf/10.1080/02705060.2002.9663931
2002	Sebastian Höss, Ingrid Jüttner, Walter Traunspurger, Gerd Pfister, Karl-Werner Schramm, Christian E.W. Steinberg	Enhanced growth and reproduction of Caenorhabditis elegans (Nematoda) in the presence of 4-Nonylphenol	Environmental Pollution	10.1016/s0269-7491(02)00161-6	35	6	The nematode Caenorhabditis elegans was exposed over a whole life-cycle (72 h) to several concentrations of 4-nonylphenol (NP; nominal concentrations: 0–350 mg/l). Growth and reproduction of C. elegans were enhanced at NP concentrations of 66 and 40 mg/l, respectively,with effects showing dose–response relationships. These stimulatory effects might be of ecological relevance in benthic habitats,w…	4-Nonylphenol; Caenorhabditis elegans; Stimulatory effect; Growth; Reproduction	Lab experiment			Celegans		https://api.elsevier.com/content/article/PII:S0269749102001616
2003	Rita Triebskorn, Stefan Adam, Anja Behrens, Stefanie Beier, Jürgen Böhmer, Thomas Braunbeck, Heidi Casper, Uwe Dietze, Maike Gernhöfer, Wolfgang Honnen, Heinz-R. Köhler, Wolfgang Körner, Jens Konradt, Reinhold Lehmann, Till Luckenbach, Axel Oberemm, Julia Schwaiger, Helmut Segner, Marija Strmac, Gerrit Schüürmann, Simonetta Siligato, Walter Traunspurger	Establishing Causality between Pollution and Effects at Different Levels of Biological Organization: The VALIMAR Project	Human and Ecological Risk Assessment: An International Journal	10.1080/713609858	20	22	The study summarizes the objectives of the VALIMAR project and gives selected examples of biomarker responses that allow causal relationships to be established between exposure and biological effects at different levels of biological organization. In this project, active and passive biomonitoring experiments with brown trout (Salmo trutta f. fario) and stone loach (Barbatula barbatula) were perfo…	biomarker; bioindicator; biomonitoring; validation; fish	Field survey				Germany	http://www.tandfonline.com/doi/pdf/10.1080/713609858
2003	Stefanie Beier, Walter Traunspurger	Seasonal distribution of free-living nematodes in the Krähenbach, a fine-grained submountain carbonate stream in southwest Germany	Nematology	10.1163/156854102765216740	28	2	Abstract: The temporal distribution of the nematode fauna in the upper 5 cm sediment of the streambed of a small submountain carbonate stream (Krähenbach, Germany) was investigated over a 1-year period. The total nematode density was low during autumn and winter and reached a maximum value of 84 individuals/10 cm2 in summer. The fresh biomass of nematodes ranged from 3.6 to 44.2 μg/10 cm2. Deposi…	age structure; community structure; Eumonhystera . liformis/vulgaris; feeding-types; streams; temporal patterns; Tobrilus cf. pellucidus; vertical distribution	Field survey	1207	71	Eumonhystera_filiformis; Eumonhystera_vulgaris	Germany	https://brill.com/view/journals/nemy/5/1/article-p113_12.xml
2003	Stefanie Beier, Walter Traunspurger	Seasonal distribution of free-living nematodes in the Körsch, a coarse-grained submountain carbonate stream in southwest Germany	Nematology	10.1163/156854103322683229	18	2	Abstract: The temporal distribution of the nematode fauna in the upper 5 cm sediment of the streambed of a small submountain carbonate stream (Körsch, Germany) was investigated over a 1-year period. The total nematode density was low during summer, autumn and winter and reached a maximum value of 2238 individuals/10 cm2 in spring. The fresh weight biomass of nematodes ranged from 13.5 to 1313 μg/…	age structure; community structure; Eumonhystera fliformis/vulgaris; E. pseudobulbosa/sp.; feeding-types; vertical distribution	Field survey	12042	113	Eumonhystera_filiformis; Eumonhystera_vulgaris	Germany	https://brill.com/view/journals/nemy/5/4/article-p481_1.xml
2003	Stefanie Beier, Walter Traunspurger	Temporal dynamics of meiofauna communities in two small submountain carbonate streams with different grain size	Hydrobiologia	10.1023/a:1026258607551	31	2	The meiofauna community (especially nematodes, oligochaetes and chironomids) in the streambed surface of two small submountain carbonate streams (KrŠhenbach and Kšrsch, Germany) was investigated from April 1998 to March 1999. The KrŠhenbach stream is relatively sorted and fine-grained, while the Kšrsch stream is more heterogeneous and coarse-grained. The streams also differ in velocity, water lev…	Lotic meiofauna; temporal dynamics; nematodes; oligochaetes; chironomid; feeding-types	Field survey			Monhysteridae	Germany
2004	Sebastian Höss, Walter Traunspurger, Gabriele F. Severin, Ingrid Jüttner, Gerd Pfister, Karl-Werner Schramm	Influence of 4-nonylphenol on the structure of nematode communities in freshwater microcosms	Environmental Toxicology and Chemistry	10.1897/03-226	31	6	We investigated the effect of 4-nonylphenol (NP) on nematode communities in the sediment of freshwater microcosms. Seven treatments were dosed with various concentrations of NP over a period of six weeks by using a controlled-release method (NP1–NP7; maximum sediment concentrations: 0.29–3.37 mg/kg dry wt). Four microcosms were not exposed to NP and served as controls. Nematode communities were a…	Nematode communities; Nonylphenol; Microcosms; Species composition; Feeding types	Field experiment	7150	36	Eumonhystera_filiformis; Eumonhystera_simplex; Tobrilus_gracilis; Monhystera_paludicola	Germany	https://api.wiley.com/onlinelibrary/tdm/v1/articles/10.1897%2F03-226
2004	Iris Michiels, Walter Traunspurger	A three year study of seasonal dynamics of a zoobenthos community in a eutrophic lake	Nematology	10.1163/1568541042843568	40	2	The meiofauna community in the eutrophic Lake Obersee was investigated, with special emphasis on nematodes, from March 2001 to December 2003. Meiobenthos showed a stable annual and seasonal pattern with oligochaetes contributing most to benthic biomass and nematodes to benthic abundance. With 152 nematode species, Lake Obersee is the most nematode species-rich lentic habitat described so far. The…	abundance; age structure; biomass, competition; feeding-types; freshwater nematodes; sex ratio; size-classes; temporal patterns	Field survey	11806	152	Eumonhystera_filiformis; Eumonhystera_pseudobulbosa; Monhystera_paludicola; Monhystera_stagnalis; Tobrilus_stefanskii	Germany	https://brill.com/view/journals/nemy/6/5/article-p655_4.xml
2004	Matthias Bergtold, Walter Traunspurger	The benthic community in the profundal of Lake Brunnsee: seasonal and spatial patterns	Archiv für Hydrobiologie	10.1127/0003-9136/2004/0160-0527	24	2	The seasonal distribution of bacteria, flagellates, ciliates, and selected metazoan organisms was investigated in the profundal sediment (18 m depth) of oligotrophic Lake Brunnsee (Germany) over a period of one year (April 1997 to April 1998). Most of the organisms displayed seasonal fluctuation with high abundance in summer and lower spring and autumn densities. Bacteria reached densities up to …	benthos; sediment; bacteria; protozoa; season	Field survey				Germany
2004	S. Beier, M. Bolley, W. Traunspurger	Predator-prey interactions between Dugesia gonocephala and free-living nematodes	Freshwater Biology	10.1046/j.1365-2426.2003.01168.x	45	3	1. Three groups of laboratory experiments clarified the role of nematodes as a potential food resource for the triclad Dugesia gonocephala. The first group measured the functional response of adult D. gonocephala feeding on juvenile or adult Caenorhabditis elegans. The feeding rates of D. gonocephala on adult and juvenile C. elegans followed a type II functional response. The maximum number of ad…	functional response; invertebrate predators/disturbers; meiofauna prey; sediment types; vertical distribution	Lab experiment			Celegans; Tobrilus_pellucidus; Trischistoma_monohystera		https://api.wiley.com/onlinelibrary/tdm/v1/articles/10.1046%2Fj.1365-2426.2003.01168.x
2005	Walter Traunspurger, Karl-Otto Rothhaupt, Lars Peters, Markus Wetzel	Community development of free-living aquatic nematodes in littoral periphyton communities	Nematology	10.1163/156854105776186352	9	4	Abstract: The development of an epilithic nematode community and the mode of colonisation was monitored over a 57-day period during spring in a field experiment in the littoral zone of a large oligotrophic lake. Two types of experimental units were used: one type prohibited direct colonisation via active crawling by elevating substrates into the water column and the second type had substrates pla…	age structure; benthos; freshwater; hard substrates; morphological adaptations; nematode species composition; passive transport; temporal patterns	Field experiment	2430	22	Chromadorina_bioculata; Eumonhystera_vulgaris	Germany	https://brill.com/view/journals/nemy/7/6/article-p901_11.xml
2005	Andre Witthöfft-Mühlmann, Walter Traunspurger, Karl-Otto Rothaupt	Meiobenthic response to river-borne benthic particulate matter - a microcosm experiment	Freshwater Biology	10.1111/j.1365-2427.2005.01425.x	5	3	1. Benthic communities inhabiting river–lake interfaces are confronted with temporal variation in the import of river-borne material to the associated littoral zone. The primary objective of this study was to evaluate the exposure to river-borne benthic particulate matter as a force shaping the meiofauna of the river–lake interface. 2. In a 2 × 2 factorial design, combinations of strongly and wea…	particulate matter; river mouth; meiofauna; littoral zone; microcosm	Field survey				Germany	https://api.wiley.com/onlinelibrary/tdm/v1/articles/10.1111%2Fj.1365-2427.2005.01425.x
2005	Iris C. Michiels, Walter Traunspurger	Seasonal variation of biodiversity and assemblage structure in freshwater nematodes	Archiv für Hydrobiologie	10.1127/0003-9136/2005/0163-0183	10	2	In a three-year field study we determined the seasonal and annual variation of abundance, biomass, species richness, and community structure of freshwater nematodes at a single station in the eutrophic Lake Obersee. The seasonal patterns observed were consistent and varied little between sampling years. Nematode abundance and biomass were highest in summer. Species richness and diversity peaked i…	benthos; biomass; community structure; nematodes; seasonal variation; species diversity	Field survey	11806	152	Eumonhystera_filiformis; Eumonhystera_pseudobulbosa; Monhyster_ paludicola; Monhystera_stagnalis; Tobrilus_stefanskii	Germany
2005	A. Traunspurger Witthöft-Mühlmann	Influence of river discharge and wind field on the freshwater meiofauna of a dynamic river mouth area	Archiv für Hydrobiologie	10.1127/0003-9136/2005/0163-0307	2	1	The littoral meiofauna adjacent to a river mouth on Lake Constance (Germany) was studied in order to determine the effect of the river on the community. From February 1999 until January 2000 sets of four replicate sediment cores were collected from a total of six sampling sites on a seasonal scale. Nematodes dominated the meiofaunal community at all sites. The combined effect of wind speed and ri…	meiofauna; river mouth; discharge; nematodes; wind	Field survey				Germany
2005	Matthias Bergtold, Walter Traunspurger	Benthic production by micro-, meio-, and macrobenthos in the profundal zone of an oligotrophic lake	Journal of the North American Benthological Society	10.1899/03-038.1	45	2	The relative contribution of microfauna (bacteria and protozoa), and metazoa (meiofauna and macrofauna) to profundal benthic production in Lake Brunnsee was examined in a 1-y study. Abundance of micro-, meio-, and macrofauna was determined and converted to biomass. Annual production was calculated using the [3H]-thymidine incorporation method for bacteria and allometric equations for protozoa and…	production; biomass; bacteria; protozoa; meiobenthos; macrobenthos; P/B/; sediment	Field survey				Germany	http://www.journals.uchicago.edu/doi/pdf/10.1899/03-038.1
2005	Iris C. Michiels, Walter Traunspurger	Benthic community patterns and the composition of feeding types and reproductive modes in freshwater nematodes	Nematology	10.1163/1568541054192234	28	2	We characterised benthic invertebrate community composition in 11 oligotrophic, alpine lakes. Nematodes were the most abundant benthic taxa in most lakes but community composition differed markedly. Several relationships between the invertebrate taxa were found but there was no strong evidence that competition or predation shaped the benthic community structure. Most lakes were dominated by a few…	abundance; alpine lakes; biodiversity; biomass, sex-ratio; trophic composition; zoobenthos	Field survey		157	Eumonhystera_filiformis	Germany, Austria	https://brill.com/view/journals/nemy/7/1/article-p21_4.xml
2005	Lars Peters, Walter Traunspurger	Species distribution of free-living nematodes and other meiofauna in littoral periphyton communities of lakes	Nematology	10.1163/1568541054879520	33	2	Abstract: Recent studies on meiofaunal and nematode communities have focused on soft sediments in streams, lakes and marine environments. Despite a large number of studies dealing with periphyton, meiofaunal and nematode communities, on littoral hard substrates in lakes have not yet been investigated in detail. Therefore, epilithic communities with particular emphasis on nematode species composit…	community structure; diversity; epilithon; feeding types; freshwater; geographical distribution; hard substrates; meiofauna; Swedish lakes	Field survey		58	Rhabdolaimus_aquaticus	Sweden	https://brill.com/view/journals/nemy/7/2/article-p267_12.xml
2005	MATTHIAS BERGTOLD, VIKTOR GUNTER, WALTER TRAUNSPURGER	Is there competition among ciliates and nematodes?	Freshwater Biology	10.1111/j.1365-2427.2005.01402.x	6	3	Biotic interaction between the ciliate Cyclidium glaucoma and the nematode Caenorhabditis elegans was investigated by manipulating the densities of the organisms in microcosms with and without sediment. 2. After 11 days the abundance of ciliates, nematodes and bacteria as well as extracellular enzyme activity were determined. Ciliates had a negative effect on nematode abundance in microcosms with…	competition; ciliate; meiobenthos; microbenthos; nematode; sediment	Lab experiment			Celegans		https://api.wiley.com/onlinelibrary/tdm/v1/articles/10.1111%2Fj.1365-2427.2005.01402.x
2005	Iris C. Michiels, Walter Traunspurger	Impact of resource availability on species composition and diversity in freshwater nematodes	Oecologia	10.1007/s00442-004-1700-6	22	2	This study investigates the long-term effects of resource availability in a freshwater nematode community. We carried out a mesocosm experiment where natural nematode communities were exposed to nutrient addition/ depletion over 2 years. Compared to the nutrient-addition treatment, species richness and diversity were strongly reduced upon nutrient depletion. The functional group of bacterial feed…	Competitive exclusion; Functional diversity; Meiobenthos; Species richness; Trophic dynamics	Lab experiment	17000	26	Eumonhystera_pseudobulbosa; Prismatolaimus_intermedius		http://link.springer.com/content/pdf/10.1007/s00442-004-1700-6.pdf
2005	Karin Hohberg, Walter Traunspurger	Predator–prey interaction in soil food web: functional response, size-dependent foraging efficiency, and the influence of soil texture	Biology and Fertility of Soils	10.1007/s00374-005-0852-9	60	2	In a series of laboratory experiments, we presented carnivorous Macrobiotus richtersi (Tardigrada, Macrobiotidae) with nematode prey to assess their importance as predator. We investigated consumption rate for (a) different prey densities (10–400 prey individuals), (b) different prey biomasses (22–80 ng), (c) different prey species (Pelodera teres, Rhabditidae, versus Acrobeloides nanus, Cephalob…	Soil fauna; Nematoda; Optimal prey; Tardigrada	Lab experiment			Pelodera_teres; Acrobeloides_nanus		http://link.springer.com/content/pdf/10.1007/s00374-005-0852-9.pdf
2005	Matthias Bergtold, Walter Traunspurger	The effect of sedimentation on the benthic community of Lake Brunnsee	Archiv für Hydrobiologie	10.1127/0003-9136/2005/0163-0287	2	2	The flux of settling particles to the sediment was manipulated in a field and laboratory experiment. In the field, sedimentation rate was reduced in experimental areas by a factor of 2.3 by covering the bottom of the lake. Sedimentation rate, bacterial parameters, as well as protozoan and metazoan abundance were recorded over a period of 8 month. The benthic community showed strong seasonal varia…	sedimentation; freshwater sediment; bacteria; protozoa; meiobenthos; macrobenthos	lab experiment; field experiment				Germany
2006	André Witthöft-Mühlmann, Walter Traunspurger, Karl Otto Rothhaupt	Nematodes of Lake Constance, Germany, with special reference to littoral communities of a river mouth area	Nematology	10.1163/156854106778614029	2	3	Abstract: Six sites within the littoral habitat of Lake Constance in Germany were studied from February 1999 to January 2000 in order to determine the influence of the inflowing River Schussen on local nematode assemblages. The sites were selected to represent a gradient of river influence within the broader river mouth area. The area as a whole was found to be rich in nematode diversity, with 10…	FRESHWATER; TROPHIC RELATION; SPATIAL PATTERN; TEMPORAL PATTERN; FEEDING TYPES; DISTURBANCE; ABUNDANCE; DAPTONEMA DUBIUM	Field survey				Germany	https://brill.com/view/journals/nemy/8/4/article-p539_7.xml
2006	Walter Traunspurger, Matthias Bergtold, Amrei Ettemeyer, Willem Goedkoop	Effects of Copepods and Chironomids on the Abundance and Vertical Distribution of Nematodes in a Freshwater Sediment	Journal of Freshwater Ecology	10.1080/02705060.2006.9664100	7	4	In the presence of copepods and chironomids the number of nematodes in a laboratory microcosm system was not influenced; however, the vertical distribution patterns in the sediment were influenced by the presence or absence of copepods and chironomids. The relative numbers of nematodes in 0-1 cm versus 1-5 cm sediment layer in copepod and copepod plus chironomid treatments were significantly high…		Lab experiment					http://www.tandfonline.com/doi/pdf/10.1080/02705060.2006.9664100
2007	Lars Peters, Helmut Hillebrand, Walter Traunspurger	Spatial variation of grazer effects on epilithic meiofauna and algae	Journal of the North American Benthological Society	10.1899/0887-3593(2007)26[78:svogeo]2.0.co;2	18	3	Periphyton is a key component of shallow littoral zones of lakes and streams because it is an important source of primary production and a food resource for herbivores. Meiofauna are abundant in periphyton, but macroinvertebrate grazer (macrograzers) effects on periphytic meiofauna have not been studied so far. We used a spatially structured field experiment (hierarchical nested design consisting…	algal biomass; herbivory; indirect effects; macroinvertebrates; meiofauna; nematodes; periphyton; spatial heterogeneity	Field experiment				Sweden	http://www.journals.uchicago.edu/doi/pdf/10.1899/0887-3593(2007)26%5B78:SVOGEO%5D2.0.CO;2
2007	Lars Peters, Markus A. Wetzel, Walter Traunspurger, Karl-Otto Rothhaupt	Epilithic communities in a lake littoral zone: the role of water-column transport and habitat development for dispersal and colonization of meiofauna	Journal of the North American Benthological Society	10.1899/0887-3593(2007)26[232:eciall]2.0.co;2	17	4	During the past 30 y, periphyton has been recognized as a key component in the benthos of lakelittoral zones. However, the role of meiofauna-sized organisms living in the periphyton and mechanismsregulating and influencing those communities largely have been neglected, and the process of communitydevelopment and colonization pathways of periphytic meiofauna are unknown in lakes. We studied thesep…	epilithon; habitat structure; meiobenthos; nematodes; passive transport; periphyton; rotifers	Field experiment	2500	22	Eumonhystera_vulgaris; Chromadorina_bioculata; Eumonhystera_filiformis; Chromadorina_viridis; Daptonema_dubium	Sweden	http://www.journals.uchicago.edu/doi/pdf/10.1899/0887-3593(2007)26%5B232:ECIALL%5D2.0.CO;2
2007	M. Bergtold, G. Mayr, W. Traunspurger	Nematodes in wastewater biofilms—Appearance and density of species in three biofilter reactors	Water Research	10.1016/j.watres.2006.09.023	5	3	Population dynamics of nematode species in biofilms of three different biofilter reactors, differing in size (pilot/laboratory scale), operation mode and biofilm carrier, were studied over a period of 1 year. In the biofilm suspension of the pilot system mean nematode density was 118Êindividuals/ml and average biomass 15Ê?g wet weight/ml. Higher mean abundance was found in the two laboratory syst…	Nematodes; Biofilter; Biofilm; Population dynamics; Species composition; Wastewater	Field experiment; lab experiment			Diploscapter_coronatus; Diplogasteritus_nudicapitatus; Acrostichus; Paroigolaimella_bernensis	Germany	https://api.elsevier.com/content/article/PII:S0043135406005392
2007	Peter Heininger, Sebastian Höss, Evelyn Claus, Jürgen Pelzer, Walter Traunspurger	Nematode communities in contaminated river sediments	Environmental Pollution	10.1016/j.envpol.2006.06.023	56	5	Nematode communities of eight sites from three river catchments were investigated in terms of the genera composition, feeding types, and life-history strategists. The sampling sites showed a gradient of anthropogenic contamination with heavy metals and organic pollutants being important factors in differentiating the sites. Nematode community structure was related to sediment pollution and the hy…	Nematode community; Generic composition; River sediments; Pollution; Site structure	Field survey	6521	168	Daptonema_dubium ; Dorylaimus_stagnalis ; Eumonhystera_filiformis ; Eumonhystera_pseudobulbosa ; Monhystera_paludicola ; Mononchus_tunbridgensis ; Tobrilus_gracilis ; Tobrilus_stefanskii	Germany	https://api.elsevier.com/content/article/PII:S0269749106004040
2007	A. Witthöft-Mühlmann, W. Traunspurger, K. O. Rothhaupt	Combined influence of river discharge and wind on littoral nematode communities of a river mouth area of Lake Constance	Aquatic Ecology	10.1007/s10452-006-9076-9	2	3	The littoral nematode community adjacent to a river mouth (River Schussen) on Lake Constance (Germany) was studied from February 1999 to January 2000 in order to determine the influence of stress resulting from fluctuations in river discharge on local nematode assemblages. Additionally, the influence of wind as a second important stress factor was considered. Six sample sites were chosen, reflect…	Habitat stress; Feeding types; Diversity; Spatial pattern; Temporal pattern; Disturbance	Field survey	12150	106	Ethmolaimus_pratensis; Prodesmodora_circulata Chromadorita_leuckarti; Monhystera_stagnalis; Monhystera_paludicola; Daptonema_dubium; Eumonhystera_filiformis; Tobrilus_medius; Tobrilus_gracilis; Tobrilus_stefanskii; Dorylaimus_stagnalis; Mesodorylaimus; Aporcelaimus	Germany	https://link.springer.com/content/pdf/10.1007/s10452-006-9076-9.pdf
2007	Marc Teiwes, Matthias Bergtold, Walter Traunspurger	Factors Influencing the Vertical Distribution of Nematodes in Sediments	Journal of Freshwater Ecology	10.1080/02705060.2007.9664173	9	3	The effects of oxygenation of sediment and the presence of macrobenthic organisms (gammarids, tubificids, and chironomid larvae) on the vertical distribution and species segregation of nematodes were studied in laboratory microcosms with freshwater sediment. The abundance of nematodes was positively affected by oxygenation, particularly in the deep sediment layers. Small nematodes increased in th…		Lab experiment	2000	22	Monhysteridae		http://www.tandfonline.com/doi/pdf/10.1080/02705060.2007.9664173
2007	Daniel Muschiol, Walter Traunspurger	Life cycle and calculation of the intrinsic rate of natural increase of two bacterivorous nematodes, Panagrolaimus sp. and Poikilolaimus sp. from chemoautotrophic Movile Cave, Romania	Nematology	10.1163/156854107780739117	41	2	The life cycle and somatic growth of two bacterivorous nematodes, Panagrolaimus sp. and Poikilolaimus sp., isolated from chemoautotrophic microbial mats in Movile Cave, Romania, were studied in monoxenic cultures at 20°C with Escherichia coli as the food source. A method is described that allows simultaneous investigation of the somatic growth pattern, age-specific fecundity, and age-specific mor…	age-specific fecundity; biofilm; culture medium; generation time; life tables; microbial mat; population growth: somatic growth	Lab experiment			Poikilolaimus; Panagrolaimus;		https://brill.com/view/journals/nemy/9/2/article-p271_12.xml
2008	Daniel Muschiol, Walter Traunspurger	Life at the extreme: meiofauna from three unexplored lakes in the caldera of the Cerro Azul volcano, Galápagos Islands, Ecuador	Aquatic Ecology	10.1007/s10452-008-9202-y	8	2	On Isla Isabela, Galápagos Archipelago, three so far unexplored lakes were investigated in the caldera of Cerro Azul, one of the most active volcanoes in the world. The lakes face recurrent desiccation and eruption events and showed distinct differences in their water chemistry. Thirty cores from the upper 15 cm of sediment indicate distinct differences in the composition of meiobenthic communiti…	Abundance; Biomass; Meiobenthos; Nematodes; Species diversity; Volcanic lakes	Field survey	887	7	Mesodorylaimus; Achromadora_pseudomicoletzkyi	Ecuador	http://link.springer.com/content/pdf/10.1007/s10452-008-9202-y.pdf
2008	Daniel Muschiol, Mirjana Marković, Ilka Threis, Walter Traunspurger	Predator-prey relationship between the cyclopoid copepod Diacyclops bicuspidatus and a free-living bacterivorous nematode	Nematology	10.1163/156854108783360203	21	4	Abstract: The potential of copepods as predators of free-living nematodes was tested by presenting Diacyclops bicuspidatus, a common holarctic cyclopoid copepod, with Panagrolaimus sp. as prey in the laboratory. Diacyclops bicuspidatus readily fed on nematodes of all size classes, including prey longer than itself. No size preference was observed. Handling times varied between a few seconds and s…	Benthos; food chain; foraging behaviour; functional response; Holling type; invertebrate predators; meiofauna prey; Panagrolaimus	Lab experiment			Panagrolaimus		https://brill.com/view/journals/nemy/10/1/article-p55_6.xml
2008	Daniel Muschiol, Mirjana Marković, Ilka Threis, Walter Traunspurger	Predatory copepods can control nematode populations: A functional-response experiment with Eucyclops subterraneus and bacterivorous nematodes	Fundamental and Applied Limnology	10.1127/1863-9135/2008/0172-0317	17	4	A classical functional-response experiment was conducted in order to test the potential of copepods as predators of free-living nematodes. The cyclopoid copepod Eucyclops subterraneus scythicus readily fed oil the two offered bacterivorous nematode species, Panagrolaimus sp. and Poikilolaimus sp. In nature, the investigated organisms are members of a very simply structured community occurring in …	microbial mat; meiofauna; invertebrate predators; food; top-down control; chain; predator-prey	Lab experiment			Panagrolaimus; Poikilolaimus
2008	Markus Liebig, Gunnar Schmidt, Daniel Bontje, Bob W. Kooi, Georg Streck, Walter Traunspurger, Thomas Knacker	Direct and indirect effects of pollutants on algae and algivorous ciliates in an aquatic indoor microcosm	Aquatic Toxicology	10.1016/j.aquatox.2008.03.010	20	7	An aquatic indoor microcosm was used to study effects of the pesticides parathion-methyl and prometryn on phototrophic flagellates (Cryptomonas sp.) and predatory ciliates (Urotricha furcata). Parathion-methyl caused effects to flagellates and ciliates at the range of low mg/L , regardless of whether the organisms were exposed separately or combined in the multi-species test system. Prometryn cau…	Cryptomonas ; Multi-species test; Parathion-methyl; Pesticides ; Prometryn ; Urotricha	Lab experiment					https://api.elsevier.com/content/article/PII:S0166445X08001070
2009	Robert Schabetsberger, Gabriele Drozdowski, Eugen Rott, Rupert Lenzenweger, Christian D. Jersabek, Frank Fiers, Walter Traunspurger, Nicola Reiff, Fabio Stoch, Alexey A. Kotov, Koen Martens, Heinrich Schatz, Roland Kaiser	Losing the Bounty? Investigating Species Richness in Isolated Freshwater Ecosystems of Oceania	Pacific Science	10.2984/049.063.0201	23	13	The South Pacific freshwater ecosystems have never been investigated systematically. Although their ecological value has long been recognized and recommended for protection, little action has been taken so far. Here, we present results of 39 lentic water bodies on 18 islands belonging to seven countries. Temperature, conductivity, and pH were measured and samples of aquatic organisms were collect…		Field survey		36	Mesodorylaimus_meyli	Cook Islands; Fiji; Samoa; Vanuatu; Tonga	http://www.bioone.org/doi/full-xml/10.2984/049.063.0201
2009	Karin Hohberg, Walter Traunspurger	Foraging theory and partial consumption in a tardigrade–nematode system	Behavioral Ecology	10.1093/beheco/arp077	22	2	We investigated foraging behavior of a carnivorous eutardigrade, Macrobiotus richtersi, living in soil or fresh water sediments, where the distribution of nematode prey is heterogeneous and where, consequently, the value of information about prey availability should be high. We directly observed diet choice in various mixtures of 2 size classes of nematodes Acrobeloides nanus, A1 (small prey) and…	food web; foraging behavior; predator–prey interaction	Lab experiment			Acrobeloides_nanus		http://academic.oup.com/beheco/article-pdf/20/4/884/17278808/arp077.pdf
2009	Daniel Muschiol, Fabian Schroeder, Walter Traunspurger	Life cycle and population growth rate of Caenorhabditis elegans studied by a new method	BMC Ecology	10.1186/1472-6785-9-14	65	3	The free-living nematode Caenorhabditis elegans is the predominant model organism in biological research, being used by a huge number of laboratories worldwide. Many researchers have evaluated life-history traits of C. elegans in investigations covering quite different aspects such as ecotoxicology, inbreeding depression and heterosis, dietary restriction/supplement, mutations, and ageing. Such t…		Lab experiment			Celegans
2010	H. R. Spieth, T. Möller, Ch. Ptatscheck, A. Kazemi-Dinan, W. Traunspurger	Meiobenthos provides a food resource for young cyprinids	Journal of Fish Biology	10.1111/j.1095-8649.2010.02850.x	36	5	Young individuals of the bottom-biting (i.e.sediment-ingesting) common carpCyprinus carpioand gudgeonGobio gobioconsumed significant amounts of nematodes in laboratory experiments,whereas the selective-feeding roachRutilus rutilusdid not. In mesocosm enclosure experimentsin the field,C. carpiostrongly decreased the nematode abundance within 4 days, whereas thebottom-biting breamAbramis bramadid n…	bream; branchial sieve; consumption of meiobenthos; carp; gudgeon; roach.	Field experiment; lab experiment				Germany	https://api.wiley.com/onlinelibrary/tdm/v1/articles/10.1111%2Fj.1095-8649.2010.02850.x
2010	Julio César López-Doval, Monika Großschartner, Sebastian Höss, Claus Orendt, Walter Traunspurger, Georg Wolfram, Isabel Muñoz	Invertebrate communities in soft sediments along a pollution gradient in a Mediterranean river (Llobregat, NE Spain)	Limnetica	10.23818/limn.29.26	11	7	The Llobregat is a highly-perturbed Mediterranean river affected by a wide range of pollutants. High concentrations of soluble reactive phosphorus and chloride are the clearest indicators of pollution in this basin. Seven sites in the mid and lower Llobre- gat basin were sampled in June 2005 to examine the invertebrate community inhabiting the soft sediments along this pollution gradient. Spatial…	Llobregat river; soft sediment; pollution gradient; invertebrates; multivariate analysis	Field survey		29	Tobrilus; Monhystera; Eumonhystera	Spain	https://www.limnetica.net/documentos/limnetica/limnetica-29-2-p-311.pdf
2010	Kai Ristau, Walter Traunspurger	Relation between nematode communities and trophic state in southern Swedish lakes	Hydrobiologia	10.1007/s10750-010-0564-5	25	2	The aim of this study was to examine whether littoral nematode community patterns are shaped by lake trophic state. It was hypothesized that trophic level is associated negatively with the proportion of omnivores and positively with the percentages of bacterial feeders, but not at all with the diversity, abundance, and biomass of freshwater nematodes. Sediment samples were taken at littoral sites…		Field survey	11710	157	Tobrilus_gracilis; Ethmolaimus_pratensis; Prodesmodora_circulata	Sweden	http://link.springer.com/content/pdf/10.1007/s10750-010-0564-5.pdf
2010	Fabian Schroeder, Daniel Muschiol, Walter Traunspurger	Fluctuating food availability may permit coexistence in bacterivorous nematodes	Fundamental and Applied Limnology	10.1127/1863-9135/2010/0178-0059	16	3	The population growth of two bacterivorous nematodes, Panagrolaimus sp. and Poikilolaimus sp., isolated from Movile Cave, Romania, was studied at 20 °C at seven different densities of Escherichia coli as food source (107–1010 cells ml–1). By using semi-fluid media in a simple discharge system, we examined nematode and bacterial abundances over 56 days with high temporal resolution. At high nemato…	Bacterivorous nematodes; chemostat; food density; grazing; population growth	Lab experiment			Panagrolaimus_thienemanni; Poikilomaimus_regenfussi
2010	Marvin Brinke, Sebastian Höss, Guido Fink, Thomas A. Ternes, Peter Heininger, Walter Traunspurger	Assessing effects of the pharmaceutical ivermectin on meiobenthic communities using freshwater microcosms	Aquatic Toxicology	10.1016/j.aquatox.2010.04.008	45	6	Ivermectin is a widely applied veterinary pharmaceutical that is highly toxic to several non-target organ- isms. So far, little is known about its impact on benthic freshwater species, although its rapid sorption to sediment particles and high persistence in aquatic sediments have raised concerns about the risk for benthic organisms. In the present study, indoor microcosms were used to assess the…	Ivermectin; Pharmaceutical; Meiofauna; Nematodes; Community; Microcosm	Lab experiment	4969	27	Tobrilus_gracilis; Monhystera_paludicola; Eumonhystera_filiformis; Tripyla_glomerans; Eumonhystera_vulgaris		https://api.elsevier.com/content/article/PII:S0166445X1000130X
2010	Markus Liebig, Álvaro Alonso Fernandez, Elke Blübaum-Gronau, Alistair Boxall, Marvin Brinke, Gregoria Carbonell, Philipp Egeler, Kathrin Fenner, Carlos Fernandez, Guido Fink, Jeanne Garric, Bent Halling-Sørensen, Thomas Knacker, Kristine A Krogh, Anette Küster, Dirk Löffler, Miguel Ángel Porcel Cots, Louise Pope, Carsten Prasse, Jörg Römbke, Ines Rönnefahrt, Manuel K. Schneider, Natascha Schweitz…	Environmental risk assessment of ivermectin: A case study	Integrated Environmental Assessment and Management	10.1002/ieam.96	79	28	The veterinary parasiticide ivermectin was selected as a case study compound within the project ERAPharm (Environmental Risk Assessment of Pharmaceuticals). Based on experimental data generated within ERAPharm and additional literature data, an environmental risk assessment (ERA) was performed mainly according to international and European guidelines. For the environmental compartments surface wa…	Environmental risk assessment; Fate and effects assessment; Parasiticides; Tiered approach; Veterinary pharmaceuticals	Lab experiment					https://api.wiley.com/onlinelibrary/tdm/v1/articles/10.1002%2Fieam.96
2011	Lars Peters, Walter Traunspurger	Temporal patterns in macrograzer effects on epilithic algae and meiofauna: a comparative approach to test for single species and whole grazer community effects	Aquatic Sciences	10.1007/s00027-011-0214-7	11	2	Within the shallow littoral zones of lakes, periphyton is an essential component, representing an important source of primary production and a food resource for herbivores. Periphytic communities are abundantly inhabited by meiofaunal organisms, which are mostly dominated by nematodes. During the last 3 decades, consumerÐresource interactions between herbivore consumers and periphytic components …	Grazing; meiofauna; periphyton; snails; temporal dynamics; theodoxus fluviatilis	Field experiment				Sweden	http://link.springer.com/content/pdf/10.1007/s00027-011-0214-7.pdf
2011	S. Höss, E. Claus, P.C. Von der Ohe, M. Brinke, H. Güde, P. Heininger, W. Traunspurger	Nematode species at risk — A metric to assess pollution in soft sediments of freshwaters	Environment International	10.1016/j.envint.2011.03.013	74	7	Soft sediments are often highly polluted as many ofthe toxic chemicals introduced into surface waters bind to settling particles. The resulting accumulation of pollutants in the sediments poses a risk for benthic communities. However, pollution induced changes in benthic communities have been difficult to determine when using macro-invertebrates as bioindicators, as these organisms are often abse…	Nematodes; Benthic invertebrates; Freshwater; Soft sediments; Pollution; NemaSPEAR	Field survey	29433	297	Eumonhystera_filiformis; Eumonhystera_pseudopulbosa; Eumonhystera_vulgaris; Eumonhystera_longicaudatula; Eumonhystera_simplex; Monhystera_paludicola; Monhystera_stagnalis; Chromadorina_bioculata; Dorylaimu_stagnalis; Daptonema_dubium; Ethmolaimus_pratensis; Ironus_tenuicaudatus; Mesodorylaimus; Paraplectonema_pedunculatum; Tobrilus_gracilis; Brevitobrilus_stefanskii; Semitobrilus_pellucidus	Germany	https://api.elsevier.com/content/article/PII:S0160412011000845
2011	S. Höss, H.T. Nguyen, R. Menzel, S. Pagel-Wieder, R. Miethling-Graf, C.C. Tebbe, J.A. Jehle, W. Traunspurger	Assessing the risk posed to free-living soil nematodes by a genetically modified maize expressing the insecticidal Cry3Bb1 protein	Science of The Total Environment	10.1016/j.scitotenv.2011.03.041	29	8	Before pest-resistant genetically modified maize can be grown commercially, the risks for soil-beneficial, non- target organisms must be determined. Here, a tiered approach was used to assess the risk to free-living soil nematodes posed by maize genetically modified to express the insecticidal Cry3Bb1 protein (event Mon88017), which confers resistance towards western corn rootworm (Diabrotica vir…	Bt-maize; Nematodes; Risk assessment; Cry3Bb1; Caenorhabditis elegans; Toxicity	Field survey	4828	59	Pratylenchus ; Rhabditis ; Acrobeloides ; Alaimus ; Filenchus ; Tylenchus ; Aphelenchoides ; Aphelenchus ; Eucephalobus ; Aporcelaimellus	Germany	https://api.elsevier.com/content/article/PII:S0048969711003317
2011	Nabil Majdi, Walter Traunspurger, Stéphanie Boyer, Benoît Mialet, Michèle Tackx, Robert Fernandez, Stefanie Gehner, Loïc Ten-Hage, Evelyne Buffan-Dubau	Response of biofilm-dwelling nematodes to habitat changes in the Garonne River, France: influence of hydrodynamics and microalgal availability	Hydrobiologia	10.1007/s10750-011-0781-6	33	9	Lotic epilithic biofilms are submitted to seasonal disturbances (e.g. flood events, self-detach- ment), which influence the biomass, diversity and viability of their algal and bacterial communities. The objective of this study is to examine whether (1) biofilm-dwelling nematodes respond to such seasonal changes in terms of diversity and community struc- ture, (2) nematode species and feeding-type…	Nematodes; periphyton; diversity; feeding types; algae; environmental factors	Field survey	2875	28	Chromadorina_bioculata; Chromadorina_viridis; Eumonhystera_dispar; Eumonhystera_vulgaris; Monhystrella_paramacrura	France	http://link.springer.com/content/pdf/10.1007/s10750-011-0781-6.pdf
2011	S. Höss, K. Schlottmann, W. Traunspurger	Toxicity of Ingested Cadmium to the Nematode Caenorhabditis elegans	Environmental Science and Technology	10.1021/es2027136	38	3	Benthic organisms ingest dissolved and particle-bound contaminants together with their food, whereas it is not clear which fraction of the ingested suspension causes the toxic effects. In the standard toxicity test using the nematode Caenorhabditis elegans, the organisms are fed with bacteria that bind contaminants, thus influencing the bioavailability of the contaminants for the organisms. To un…	Bacteria; Food; Metals; Caenorhabditis elegans; Toxicity; Bioavailability	Lab experiment			Celegans		https://pubs.acs.org/doi/pdf/10.1021/es2027136
2011	Marvin Brinke, Peter Heininger, Walter Traunspurger	A semi-fluid gellan gum medium improves nematode toxicity testing	Ecotoxicology and Environmental Safety	10.1016/j.ecoenv.2011.07.007	18	3	This study examined an alternative test medium for nematodes that use gellan gum as the gelling agent instead of agar. The semi-fluid consistency of the gel-like component nematode growth gellan gum (CNGG) supports three-dimensional distribution of the nematodes and food bacteria, but still allows free movement of the former. Moreover, flexible preparation of the medium and easy recovery of the t…	Nematodes; Bioassay; Toxicity test; Test medium; Hydrophobic; Nematicide	Lab experiment			Celegans; Panagrolaimus_thienemanni		https://api.elsevier.com/content/article/PII:S014765131100193X
2011	Marvin Brinke, Kai Ristau, Matthias Bergtold, Sebastian Höss, Evelyn Claus, Peter Heininger, Walter Traunspurger	Using meiofauna to assess pollutants in freshwater sediments: A microcosm study with cadmium	Environmental Toxicology and Chemistry	10.1002/etc.387	26	7	The direct and indirect effects of Cd on benthic communities were assessed in a freshwater microcosm study over a period of seven months (218 d). Cadmium was regarded as a model substance to evaluate the usefulness of small-scale laboratory microcosm with microscopic fauna. In particular, effects on the meiofauna community, an ecologically important but rather neglected benthic component, were in…	Meiofauna; Microfauna; Nematodes; Community; Microcosms	Lab experiment	3121	38	Daptonema_dubium; Eumonhystrea_filiformis; Ironus_tenuicaudatus		https://api.wiley.com/onlinelibrary/tdm/v1/articles/10.1002%2Fetc.387
2011	Michael Faupel, Kai Ristau, Walter Traunspurger	Biomass estimation across the benthic community in polluted freshwater sediment—A promising endpoint in microcosm studies?	Ecotoxicology and Environmental Safety	10.1016/j.ecoenv.2011.06.022	12	3	With respect to the ecological relevance of endpoints, biomass as an endpoint might be promising regarding ecotoxicological assessments of benthic communities. In a freshwater microcosm study the effect of two cadmium (Cd) concentrations (50 and 400 mg Cd/kg dw) on biomass and abundance of a benthic community were investigated over a period of seven months. Specifically, the sensitivity of both e…	Biomass; Endpoint; Microcosm; Benthos; Heavy metal	Lab experiment					https://api.elsevier.com/content/article/PII:S0147651311001862
2012	Nabil Majdi, Michèle Tackx, Walter Traunspurger, Evelyne Buffan-Dubau	Feeding of biofilm-dwelling nematodes examined using HPLC-analysis of gut pigment contents	Hydrobiologia	10.1007/s10750-011-0920-0	26	4	The natural feeding behaviour of the nematodes Chromadorina bioculata (Schultze in Carus 1857) and Chromadorina viridis (Linstow 1876) was studied in situ, within epilithic biofilms of the Garonne River (France). Based on their feeding- type characteristics and population dynamics, it was hypothesised that these species feed selectively on microphytobenthos (MPB) within the biofilm, and that amon…	Selectivity; grazing; diatoms; periphyton; meiofauna; chromadorina	Field experiment			Chromadorina_bioculata	France	http://link.springer.com/content/pdf/10.1007/s10750-011-0920-0.pdf
2012	Lars Peters, Carsten Faust, Walter Traunspurger	Changes in community composition, carbon and nitrogen stable isotope signatures and feeding strategy in epilithic aquatic nematodes along a depth gradient	Aquatic Ecology	10.1007/s10452-012-9408-x	8	3	Periphyton is an important component within the littoral zones of lakes, but it is known to vary dramatically on small (cmÐm) and large (km) spatial scales, showing differences in composition and abundance. Until relatively recently, changes in periphyton composition along depth gradients have not been studied sufficiently and the response of small meiobenthic invertebrates inhabiting the periphy…	periphyton; nematode feeding types; depth gradient; stable isotopes; 13C; 15N	Field experiment	1800	25	Eumonhystera_dispar; Punctodora_ratzeburgensis	Sweden	http://link.springer.com/content/pdf/10.1007/s10452-012-9408-x.pdf
2012	W. Traunspurger, S. Höss, A. Witthöft-Mühlmann, M. Wessels, H. Güde	Meiobenthic community patterns of oligotrophic and deep Lake Constance in relation to water depth and nutrients	Fundamental and Applied Limnology	10.1127/1863-9135/2012/0144	49	5	Between February and April 2004, 48 sites in Lake Constance (Germany) were investigated to determine the distribution of the meiobenthic community, including 16 sites from the sub-littoral (13-30 m water depth), 16 sites from the profundal (31-99 m) and 16 sites from the deep profundal (100-250 m). Lake-wide analysis showed no simple distribution pattern, but rather a heterogenic meiobenthic comm…	meiofauna distribution; nematodes; rotifers; crustaceans; oligochaetes; tardigrades; algae; bacteria; aquatic invertebrates; deep lakes	Field survey				Germany
2012	R. Schabetsberger, R. Kaiser, E. Rott, R. Lenzenweger, W. Traunspurger, A. A. Kotov, F. Fiers, S. Gaviria, C. Meisch, S. Mahunka, R. D. Campbell, E. Razafindranaivo, M. Sztatecsny	On the brink - investigating biodiversity in endangered crater lakes of the Amber Mountains National Park (Madagascar)	Aquatic Conservation: Marine and Freshwater Ecosystems	10.1002/aqc.2286	3	13	Madagascar's biodiversity is vanishing at an alarming pace. The documentation of this loss has so far focused on terrestrial habitats and organisms. Eight volcanic crater lakes in the Amber Mountains National Park (Northern Madagascar) and surroundings were investigated for the first time to describe limnological conditions and aquatic biodiversity. Seven of the lakes were affected by deforestati…	lgae; alien species; biogeography; deforestation; invertebrates; island; lake; taxonomy	Field survey		23		Madagascar	https://api.wiley.com/onlinelibrary/tdm/v1/articles/10.1002%2Faqc.2286
2012	Joana Patrício, Helena Adão, João M. Neto, Ana S. Alves, Walter Traunspurger, João Carlos Marques	Do nematode and macrofauna assemblages provide similar ecological assessment information?	Ecological Indicators	10.1016/j.ecolind.2011.06.027	44	6	Do nematode and macrofauna assemblages provide similar ecological assessment information? To answer this question, in the summer of 2006, subtidal soft-bottom assemblages were sampled and environmental parameters were measured at seven stations covering the entire salinity gradient of the Mondego estuary. Principal components analysis (PCA) was performed on the environmental parameters, thus esta…	Nematodes; Macrofauna; Estuarine gradient; Ecological assessment; Portugal	Field survey		61	Metachromadora	Portugal	https://api.elsevier.com/content/article/PII:S1470160X11001981
2012	Fabian Schroeder, Lars Peters, Walter Traunspurger	Temporal variations in epilithic nematode assemblages in lakes of different productivities	Fundamental and Applied Limnology	10.1127/1863-9135/2012/0332	12	3	The aim of the present study was to examine: (1) the response of nematodes to temporal changes in the periphyton of stony hard-substrates (epilithon) and (2) the distribution of the nematode species among lakes of different productivities. Accordingly, epilithic nematode assemblages of three Swedish lakes with different trophic states were analyzed over a 2-year period. Depending on habitat size …	meiofauna; nematodes; periphyton; feeding types; trophic state	Field survey	7200	48	Punctodora_ratzeburgensis	Sweden
2012	Fabian Schroeder, Walter Traunspurger, Kurt Pettersson, Lars Peters	Temporal changes in periphytic meiofauna in lakes of different trophic states	Journal of Limnology	10.4081/jlimnol.2012.e23	25	4	Meiofaunal organisms in the periphyton of stony hard-substrates (epilithon) were studied in three Swedish lakes with different trophic states (oligo-, meso- and eutrophic) with respect to seasonal successions in abundance, biomass, and production. Over a period of 2 years, the meiofaunal population of all three lakes fluctuated greatly, with densities varying up to nine-fold within a season. In t…	nematodes, meiofaunal production, epilithon, seasonal succession, Lake Erken	Field survey				Sweden	http://www.jlimnol.it/index.php/jlimnol/article/viewFile/473/471
2012	Sebastian Höss, Wolfgang Ahlf, Matthias Bergtold, Elke Bluebaum-Gronau, Marvin Brinke, Gerhild Donnevert, Ralph Menzel, Christel Möhlenkamp, Hans-Toni Ratte, Walter Traunspurger, Brigitte von Danwitz, Hans-Jürgen Pluta	Interlaboratory comparison of a standardized toxicity test using the nematode Caenorhabditis elegans (ISO 10872)	Environmental Toxicology and Chemistry	10.1002/etc.1843	40	12	A ring test was carried out within the standardization process ofISO 10872 to evaluate the precision of the toxicity test for the nematode Caenorhabditis elegans. Eight different laboratories tested aqueous solutions of the reference substance benzylcetyldime- thylammonium chloride as well as native sediments and soils for toxic effects on the growth and reproduction of C. elegans. Validity crite…	Caenorhabditis elegans; Sediment toxicity test; Soil toxicity test; Ring test; ISO 10872	Lab experiment			Celegans		https://api.wiley.com/onlinelibrary/tdm/v1/articles/10.1002%2Fetc.1843
2012	Michael Faupel, Walter Traunspurger	Secondary production of a zoobenthic community under metal stress	Water Research	10.1016/j.watres.2012.03.052	12	2	Little is known about the influence of toxicants on the function of freshwater sediments. To better understand these effects, a long-term microcosm experiment was carried out with cadmium (Cd) as the model pollutant (50 and 400 mg Cd/kg dw). In a seven-month study the effect of Cd was examined on secondary production of the zoobenthos (higher taxonomic level) and specifically of the nematode comm…	Ecotoxicology; Cadmium; Sediment; Microcosm; Function	Lab experiment	6000	30			https://api.elsevier.com/content/article/PII:S0043135412002266
2012	Kai Ristau, Michael Faupel, Walter Traunspurger	The effects of nutrient enrichment on a freshwater meiofaunal assemblage	Freshwater Biology	10.1111/j.1365-2427.2012.02750.x	16	3	1. The effects of eutrophication on phytoplankton, zooplankton and fish in lakes are well known. By contrast, little is known about the response of the zoobenthos to nutrient enrichment, while smaller organisms, such as the meiofauna, have for the most part been neglected. 2. In a long-term (16 months) microcosm experiment, we assessed the effects of five levels of nutrients [total phosphorus (TP…	biomass; density; meiofauna; nematodes; species richness	Lab experiment	5600	46			https://api.wiley.com/onlinelibrary/tdm/v1/articles/10.1111%2Fj.1365-2427.2012.02750.x
2012	Michael Faupel, Kai Ristau, Walter Traunspurger	The functional response of a freshwater benthic community to cadmium pollution	Environmental Pollution	10.1016/j.envpol.2011.11.004	18	3	Theory predicts that in freshwater communities under chemical stress secondary production will decrease while the rate of biomass turnover (P/B) will increase. However, this concept has never been tested on organisms of smaller size (bacteria, protozoans, small metazoans), although they form the basis of the heterotrophic food web. The present work describes the results of a 7-month microcosm stu…	Secondary production; P/B ratio; Ecosystem functioning	Lab experiment					https://api.elsevier.com/content/article/PII:S0269749111006208
2012	G. Wolfram, S. Höss, C. Orendt, C. Schmitt, Z. Adámek, N. Bandow, M. Großschartner, J.V.K. Kukkonen, V. Leloup, J.C. López Doval, I. Muñoz, W. Traunspurger, A. Tuikka, C. Van Liefferinge, P.C. von der Ohe, E. de Deckere	Assessing the impact of chemical pollution on benthic invertebrates from three different European rivers using a weight-of-evidence approach	Science of The Total Environment	10.1016/j.scitotenv.2012.07.065	34	16	The aim of this study was to combine different lines of evidence on the impact of chemical pollution on ben- thic invertebrate communities in three European river basins (Elbe, Scheldt, and Llobregat). The study inte- grates chemical analyses, a battery of different sediment toxicity tests, and field data from soft-sediment meio- and macrobenthic fauna within a sediment-quality triad in which chi…	Benthic macroinvertebrates; Nematodes; Chemical pollution; Bioassays; Sediment-quality triad (SQT); Weight of Evidence (WoE)	Lab experiment; Field study	1341	112	Eumonhystera_filiformis; Eumonhystera_dispar; Monhystera_paludicola; Tobrilus_gracilis; Neotobrilus_diversipapillatus	Belgium; Czech Republic; Spain	https://api.elsevier.com/content/article/PII:S0048969712010108
2013	Fabian Schroeder, Dominik Kathöfer, Walter Traunspurger, Lars Peters	Grazing effects on nematodes and other components of the periphyton at three depths in Lake Erken	Freshwater Science	10.1899/12-214.1	4	4	The periphyton of stony hard substrates in the littoral zone of lakes is inhabited by an abundant and diverse algae and meiofauna assemblage that is regulated by grazing. The objective of our study was to examine the effect of macroinvertebrate grazers on periphytic algae and meiofaunal organisms at different depths in the littoral zone of Lake Erken (Sweden). To this end, a 2-factorial field exp…	meiofauna; nematodes; periphyton; freshwater snails; grazing; Lake Erken	Field experiment	2250	22		Sweden	http://www.journals.uchicago.edu/doi/pdf/10.1899/12-214.1
2013	Kai Ristau, Sebastian Steinfartz, Walter Traunspurger	First evidence of cryptic species diversity and significant population structure in a widespread freshwater nematode morphospecies (Tobrilus gracilis)	Molecular Ecology	10.1111/mec.12414	36	3	Free-living nematodes are ubiquitous and highly abundant in terrestrial and aquatic environments, where they sustain ecosystem functioning by mineralization processes and nutrient cycling. Nevertheless, very little is known about their true diversity and intraspecific population structure. Recent molecular studies on marine nematodes indicated cryptic diversity and strong genetic differentiation …	cryptic lineages; dispersal abilities; founder effects; genetic structure; priority effects	Field survey	100			Germany	https://api.wiley.com/onlinelibrary/tdm/v1/articles/10.1111%2Fmec.12414
2013	Ursula Eisendle-Flöckner, Christian D. Jersabek, Martin Kirchmair, Kerstin Hashold, Walter Traunspurger	Community patterns of the small riverine benthos within and between two contrasting glacier catchments	Ecology and Evolution	10.1002/ece3.679	11	5	Ongoing glacial retreat is expected to lead to numerous changes in glacier-fed rivers. This study documents the development of community composition of the hitherto widely neglected micro- and meiobenthos (MMB: bacteria, fungi, algae, protists, and meiofauna) in glacier rivers in response to the distinct habitat conditions driven by different stages of (de)glacierization. Our model is based on th…	algae; bacteria; copepods; fungi; glacier retreat; glacier river; local patterns; meiofauna; nanoflagellates; nematodes; regional diversity; rotifers	Field survey		69		Austria	https://api.wiley.com/onlinelibrary/tdm/v1/articles/10.1002%2Fece3.679
2013	Fabian Schroeder, Lars Peters, Walter Traunspurger	Nematodes in the periphyton of lakes: Variations in diversity, species composition, age structure, and sex ratio	International Review of Hydrobiology	10.1002/iroh.201301652	5	3	Temporal fluctuations in the diversity, sex ratio, age, and species composition of free-living nematodes inhabiting the periphyton of stony hard-substrates were determined in three Swedish lakes differing in trophic state. Over a two-year sampling period, different temporal patterns were observed. In the oligotrophic lake, nematode diversity showed moderate fluctuations and peaked in early summer…	Epilithon; Meiofauna; Seasonal succession; species richness; Trophic state	Field survey	7200	48		Sweden	https://api.wiley.com/onlinelibrary/tdm/v1/articles/10.1002%2Firoh.201301652
2013	Sebastian Höss, Ralph Menzel, Frank Gessler, Hang T. Nguyen, Johannes A. Jehle, Walter Traunspurger	Effects of insecticidal crystal proteins (Cry proteins) produced by genetically modified maize (Bt maize) on the nematode Caenorhabditis elegans	Environmental Pollution	10.1016/j.envpol.2013.03.002	18	6	The genetically modified maize MON89034 x MON88017 expresses different crystal (Cry) proteins with pesticidal activity against the European corn borer (Cry1.105; Cry2Ab2) and the Western corn root worm (Cry3Bb1). Non-target organisms, such as soil nematodes, might be exposed to the Cry proteins that enter the soil in course of crop growing. Therefore, the risk of those proteins for nematodes was …	Cry proteins; Bt maize; Nematodes; Caenorhabditis elegans; Reproduction; Risk assessment	Lab experiment			Celegans		https://api.elsevier.com/content/article/PII:S0269749113001188
2013	Marvin Brinke, Peter Heininger, Walter Traunspurger	Effects of a bioassay-derived ivermectin lowest observed effect concentration on life-cycle traits of the nematode Caenorhabditis elegans	Ecotoxicology	10.1007/s10646-012-1011-3	11	3	The pharmaceutical ivermectin is used to treat parasitic infections, such as those caused by nematodes. While several studies have demonstrated the severe effects of ivermectin on non-target organisms, little is known about the drug’s impact on free-living nematodes. In the present work, a full life-cycle experiment was conducted to estimate how an ivermectin lowest observed effect con- centratio…	Nematodes; Ivermectin; Life history; Life-cycle traits; Population; Population growth rate	Lab experiment			Celegans		http://link.springer.com/content/pdf/10.1007/s10646-012-1011-3.pdf
2013	Sebastian Weber, Walter Traunspurger	Food choice of two bacteria-feeding nematode species dependent on food source, food density and interspecific competition	Nematology	10.1163/15685411-00002679	15	2	Feeding selectivity and flexibility are generally poorly understood behaviours of free-living nematodes. In the present study, the food choice and feeding habits of two bacteria-feeding, free-living species, Panagrolaimus cf. thienemanni and Poikilolaimus sp. (Nematoda), isolated from Movile Cave (Romania), were examined with respect to food source, food density and interspecific competition. The…	coexistence; competitive exclusion; diet; diversity; feeding behaviour; feeding habits; Panagrolaimus; Poikilolaimus	Lab experiment			Panagrolaimus_thienemanni; Poikilolaimua_regenfussi		https://brill.com/view/journals/nemy/15/3/article-p291_3.xml
2013	Kai Ristau, Michael Faupel, Walter Traunspurger	Effects of nutrient enrichment on the trophic structure and species composition of freshwater nematodes—a microcosm study	Freshwater Science	10.1899/11-104.1	11	3	We explored changes in trophic structure and species composition of freshwater nematodes in response to nutrient enrichment in microcosms for 16 mo. Succession of functional groups differed significantly among the 5 nutrient treatments, which ranged from oligotrophic to polytrophic conditions, in the 2nd half of the experiment. Differences among nutrient levels were most important for representat…	benthic food web; biomass; density; functional groups; meiofauna; feeding types	Lab experiment					http://www.journals.uchicago.edu/doi/pdf/10.1899/11-104.1
2013	Tafesse Kefyalew Estifanos, Walter Traunspurger, Lars Peters	Selective feeding in nematodes: a stable isotope analysis of bacteria and algae as food sources for free-living nematodes	Nematology	10.1163/156854112x639900	16	3	Laboratory experiments with stable isotopes (13C and 15N) were conducted to determine the importance of bacteria and algae as food sources for free-living nematodes. All tested bacterivorous nematodes (Caenorhabditis elegans, Acrobeloides tricornis, Poikilolaimus sp. and Panagrolaimus sp.) were found to be depleted in ?13C (on average by ?1.71Ê± 0.56ä) and enriched in ?15N (on average by 3.17Ê± 1…	13C; 15N; caenorhabditis elegans; nematode diet; periphyton; tracers; trophic shift	lab experiment; field experiment				Sweden	https://brill.com/view/journals/nemy/15/1/article-p1_1.xml
2014	Nabil Majdi, Anatole Boiché, Walter Traunspurger, Antoine Lecerf	Predator effects on a detritus-based food web are primarily mediated by non-trophic interactions	Journal of Animal Ecology	10.1111/1365-2656.12189	43	4	Predator effects on ecosystems can extend far beyond their prey and are often not solely lethally transmitted. Change in prey traits in response to predation risk can have important repercussions on community assembly and key ecosystem processes (i.e. trait-mediated indirect effects). In addition, some predators themselves alter habitat structure or nutrient cycling through ecological engineering…	ecological engineering; food web; freshwater; litter decomposition; macrofauna; meiofauna; non-consumptive effects; predator-prey interactions; structural equation modelling; trait-mediated indirect interactions	Field experiment	900	10	Eumonhystera_pseudobulbosa; Eumonhystera_vulgaris; Eumonhystera_dispar	France	https://api.wiley.com/onlinelibrary/tdm/v1/articles/10.1111%2F1365-2656.12189
2014	Ardeshir Kazemi-Dinan, Fabian Schroeder, Lars Peters, Nabil Majdi, Walter Traunspurger	The effect of trophic state and depth on periphytic nematode communities in lakes	Limnologica	10.1016/j.limno.2013.05.011	15	5	The aim of this study was to investigate whether nematode community patterns are shaped by nutrient and light availability. Accordingly, nematode communities inhabiting periphyton were investigated at gradual water depths (50, 150 and 250Êcm) in three Swedish lakes showing graded trophic states. It was hypothesized that: (1) nematode density correlates positively with increasing nutrient availabi…	Biofilm; Community ecology; Trophic structure; Meiofauna; Algae; Grazing	Field experiment	1500	35	Chromadorita_leuckartii; Punctodora_ratzeburgensis	Sweden	https://api.elsevier.com/content/article/PII:S0075951113000741
2014	Chistoph Ptatscheck, Walter Traunspurger	The meiofauna of artificial water-filled tree holes: colonization and bottom-up effects	Aquatic Ecology	10.1007/s10452-014-9483-2	16	2	The meiofaunal community of artificial water-filled tree holes was determined, and the bottom-up effects of different amounts of leaf litter on abundance and diversity were estimated. We assume a positive impact of leaf litter on meiofaunal abundances, species diversity, and trophic links. Plastic cups with different amounts of leaf litter were placed in a beech forest (Teutoburg Forest, Bielefel…	Phytotelmata;Tree holes; Food web; Nematoda _x0002_ Rotatoria	Field survey		29	Plectus_cirratus; Plectus_accuminatus	Germany	http://link.springer.com/content/pdf/10.1007/s10452-014-9483-2.pdf
2014	Sebastian Weber, Walter Traunspurger	Consumption and prey size selection of the nematode Caenorhabditis elegans by different juvenile stages of freshwater fish	Nematology	10.1163/15685411-00002793	15	3	Meiofauna, and nematodes in particular, play an essential role in the diet of certain juvenile freshwater fish. However, the specific consumption and prey size selection of fishes on nematodes is largely unrecognised. In this study, the effects of different juvenile stages of widely distributed common European freshwater fish, gudgeon (Gobio gobio), roach (Rutilus rutilus), ninespine stickleback …	aquaculture; branchial basket; diet; meiobenthos; predator-prey interaction	Lab experiment			Celegans		https://brill.com/view/journals/nemy/16/6/article-p631_1.xml
2014	Luana Monteiro, Marvin Brinke, Giovanni dos Santos, Walter Traunspurger, Tom Moens	Effects of heavy metals on free-living nematodes: A multifaceted approach using growth, reproduction and behavioural assays	European Journal of Soil Biology	10.1016/j.ejsobi.2014.02.005	23	5	Toxicity tests, using single species bioassays, are a promising way to understand the biological effects of toxicants. The aims of this study are: (a) to assess sublethal effect concentrations of the heavy metals Pb, Zn and Ni for the free-living nematode Caenorhabditis elegans using a liquid assay focussing on growth and reproduction as endpoints; and (b) to test a behavioural assay with taxis t…	Ecotoxicology; Heavy metals; Nematoda; Caenorhabditis elegans; Bioassay; Reproduction; Growth; Behaviour	Lab experiment			Celegans		https://api.elsevier.com/content/article/PII:S1164556314000119
2014	Matthew Vangheel, Walter Traunspurger, Nicole Spann	Effects of the antibiotic tetracycline on the reproduction, growth and population growth rate of the nematode Caenorhabditis elegans	Nematology	10.1163/15685411-00002740	11	3	The antibiotic tetracycline (TC) has been reported in natural systems, a consequence of its abundant usage in farming. TCs are protein synthesis inhibitors that are effective against bacteria but adverse effects on non-target organisms, whilst less well understood, have also been demonstrated. This study is the first investigation into the effects of this common antibiotic on the growth, reproduc…		Lab experiment			Celegans		https://brill.com/view/journals/nemy/16/1/article-p19_3.xml
2014	Sebastian Höss, Nicola Reiff, Hang T. Nguyen, Johannes A. Jehle, Hanna Hermes, Walter Traunspurger	Small-scale microcosms to detect chemical induced changes in soil nematode communities — Effects of crystal proteins and Bt-maize plant material	Science of The Total Environment	10.1016/j.scitotenv.2013.11.076	14	6	Small-scale laboratory microcosms (30 g soil in 50 ml tubes) were evaluated for their suitability to assess the im- pact of chemicals on in situ soil nematode communities. For this purpose, appropriate conditions in the micro- cosms were explored to ensure stable conditions and a homogenous distribution of the nematodes. Then, the microcosms were used to assess the toxicity ofinsecticidal crystal…	Soil microcosm; Nematodes; Cry proteins; Bt-maize; Maturity index; Genus composition	Lab experiment	8792	137	Rhabditoidea; Pratylenchus; Mesorhabditidae; Filenchus; Eucephalobus; Aporcelaimellus; Bitylenchus; Acrobeloides		https://api.elsevier.com/content/article/PII:S0048969713013594
2014	Sebastian Weber, Walter Traunspurger	Top-down control of a meiobenthic community by two juvenile freshwater fish species	Aquatic Ecology	10.1007/s10452-014-9498-8	13	2	Top-down control of prey assemblages by fish predation has been clearly demonstrated for zooplankton and macroinvertebrates. However, in the benthic communities of freshwater ecosystems, the impact of fish predation on meiofaunal assemblages is nearly unknown. In this study, the predation effects of juvenile carp (Cyprinus carpio) and gudgeon (Gobio gobio) on meiofaunal abundance, biomass, commun…	Carp; Diversity;_x0002_ Gudgeon; Meiofauna; _x0002_ Predation; Prey	Lab experiment					http://link.springer.com/content/pdf/10.1007/s10452-014-9498-8.pdf
2015	Nabil Majdi, Walter Traunspurger, John S. Richardson, Antoine Lecerf	Small stonefly predators affect microbenthic and meiobenthic communities in stream leaf packs	Freshwater Biology	10.1111/fwb.12622	19	4	Predators affect benthic communities and ecological processes through consuming and scaring prey as well as through engineering effects on the habitat. Experimental evidence of top-down predatory effects in leaf packs comes from studies assessing how large predators affect shredders and therefore the litter decomposition rate. In this study, we investigated the effects of smaller invertebrate pre…	community structure; ecological engineering; interference; litter decomposition; predator-prey interactions	Field experiment	1566	80	Eumonhystera_tatrica	Canada	https://api.wiley.com/onlinelibrary/tdm/v1/articles/10.1111%2Ffwb.12622
2015	Nabil Majdi, Anatole Boiché, Walter Traunspurger, Antoine Lecerf	Community patterns and ecosystem processes in forested headwater streams along a gradient of riparian canopy openness	Fundamental and Applied Limnology	10.1127/fal/2015/0740	11	4	Riparian forest canopy influences stream community and ecosystem functions primarily through providing shade and organic matter to streams. We examined effects of forest canopy cover on autotrophic and heterotrophic processes and on benthic communities of ten forested headwater streams forming a subtle gradient of canopy openness (0Ð25%). We measured periphyton standing crop and litter breakdown …	litter breakdown; riparian zones; invertebrate community; meiofauna; fungi; algae; nematodes	Field experiment	1035	44	Eumonhystera_pseudobulbosa; Eumonhystera_vulgaris	France
2015	Sebastian Höss, Nicola Reiff, Richard Ottermanns, Sibylle Pagel-Wieder, Anja B. Dohrmann, Christoph C. Tebbe, Walter Traunspurger	Risk assessment of the cultivation of a stacked Bt-maize variety (MON89034 × MON88017) for nematode communities	Soil Biology and Biochemistry	10.1016/j.soilbio.2015.08.022	6	7	Genetically modified Bt-maize MON89034 x MON88017 contains three different genes derived from Bacillus thuringiensis (Bt) which enable protection against insect pests, due to expression of three different insecticidal crystal proteins (Cry proteins), i.e., Cry1A.105 and Cry2Ab2 against the European corn borer and Cry3Bb1 against the Western corn root worm. Nematodes are important organisms in agr…	Stacked Bt-maize; Nematoda; Risk assessment; Field study; Cry proteins	Field experiment	11795	153	Rhabditoidea; Alaimus; Aporcelaimellus; Bitylenchus; Acrobeles; Pratylenchus; Ecumenicus; Eucephalobus; Pungentus; Mesorhabditidae	Germany	https://api.elsevier.com/content/article/PII:S0038071715003004
2015	Sebastian Weber, Walter Traunspurger	The effects of predation by juvenile fish on the meiobenthic community structure in a natural pond	Freshwater Biology	10.1111/fwb.12665	46	2	Benthic communities in aquatic ecosystems include an abundant and functionally important meiofaunal component. The effects of predation by fish on zooplankton, macroinvertebrates and periphyton in freshwater habitats have been clearly demonstrated, whereas impacts on meiofaunal assemblages are poorly understood. In this study, the predation effects of benthivorous juvenile carp (Cyprinus carpio) …	Cyprinus carpio; meiofauna; secondary production; size structure; top-down	Field experiment	13191	37		Germany	https://api.wiley.com/onlinelibrary/tdm/v1/articles/10.1111%2Ffwb.12665
2015	Daniel Muschiol, Olav Giere, Walter Traunspurger	Population dynamics of a cavernicolous nematode community in a chemoautotrophic groundwater system	Limnology and Oceanography	10.1002/lno.10017	16	3	Movile Cave harbors a completely isolated groundwater ecosystem. Although it lacks any input of photo-autotrophically based food, it is inhabited by a rich invertebrate community. Chemoautotrophic microbialmats float at the surface of the thermomineral cave water, which is rich in sulfide and methane. The matsare mainly inhabited by dense populations of five bacterivorous nematode species and one…		Field experiment	806		Poikilolaimus	Romania	https://api.wiley.com/onlinelibrary/tdm/v1/articles/10.1002%2Flno.10017
2015	Bianca Kreuzinger-Janik, Fabian Schroeder, Nabil Majdi, Walter Traunspurger	Depth-Related Effects on a Meiofaunal Community Dwelling in the Periphyton of a Mesotrophic Lake	PLOS ONE	10.1371/journal.pone.0137793	5	4	Periphyton is a complex assemblage of micro- and meiofauna embedded in the organic matrix that coats most submerged substrate in the littoral of lakes. The aim of this study was to better understand the consequences of depth-level fluctuation on a periphytic community. The effects of light and wave disturbance on the development of littoral periphyton were evaluated in Lake Erken (Sweden) using a…		Field experiment	5000	19	Punctodora_ratzeburgensis	Sweden	http://dx.plos.org/10.1371/journal.pone.0137793
2015	Christoph Ptatscheck, Birgit Dümmer, Walter Traunspurger	Nematode colonisation of artificial water-filled tree holes	Nematology	10.1163/15685411-00002913	10	3	Nematodes inhabiting artificial water-filled tree holes were monitored over 16 months by placing 300 plastic cups in four forest areas. For the first time we investigated the importance of forest soils for nematode dispersal and colonisation of tree holes. On average, 91% of the cups were settled by a total of 35 species (maximum 58 336 individuals 100 cm−2). They were dominated by the bacterial …	forest ecosystems; meta-community; passive dispersal; phytotelmata; temporal waters	Field survey	3867	35	Dolichorhabditis_dolichura	Germany	https://brill.com/view/journals/nemy/17/8/article-p911_3.xml
2015	Walter Traunspurger, Ilka Threis, Nabil Majdi	Vertical and temporal distribution of free-living nematodes dwelling in two sandy-bed streams fed by helocrene springs	Nematology	10.1163/15685411-00002914	17	3	We monitored for 1 year the sediment nematofauna of two headwater streams located nearby water resurgence from typical helocrene springs. Nematode community composition, benthic organic matter (BOM), and chlorophyll a (BChl a) were assessed in two sediment layers (0Ð5 and 5Ð10 cm depth), providing insights into nematode vertical distribution. Globally, the density, diversity, and functional richn…	age structure; community structure; feeding-types; population dynamics; prodesmodora actica; sex structure	Field survey	5925	120	Prodesmodora_arctica; Anaplectus_grandepapillatus; Filenchus_thornei; Chromadorita_leuckartii	Germany	https://brill.com/view/journals/nemy/17/8/article-p923_4.xml
2015	Christoph Ptatscheck, Walter Traunspurger	Meio- and Macrofaunal Communities in Artificial Water-Filled Tree Holes: Effects of Seasonality, Physical and Chemical Parameters, and Availability of Food Resources	PLOS ONE	10.1371/journal.pone.0133447	14	2	Objectives In this study we investigated the dynamics of meiofaunal and macrofaunal communities in artificial water-filled tree holes. The abundances and, for the first time, biomasses and secondary production rates of these communities were examined. The experimental set-up consisted of 300 brown plastic cups placed in temperate mixed forests and sampled five times over a period of 16 months to …		Field survey				Germany	http://dx.plos.org/10.1371/journal.pone.0133447
2015	Kai Ristau, Nicole Spann, Walter Traunspurger	Species and trait compositions of freshwater nematodes as indicative descriptors of lake eutrophication	Ecological Indicators	10.1016/j.ecolind.2015.01.010	11	3	In recent years, the analysis of single or multiple species trait patterns was regarded as a reliable biomonitoring tool alternative or in addition to the traditional taxon-based methods. Hitherto, the trait approach was overwhelmingly applied to macroinvertebrate assemblages to monitor anthropogenic induced degradations of freshwater ecosystems. However, little is known yet whether bio-ecologica…	Cultural eutrophication; Trait-based analysis; Nematode assemblages; Indicators; Biomonitoring	Field survey		30		Germany; Sweden	https://api.elsevier.com/content/article/PII:S1470160X15000114
2015	Kai Ristau, Yeliz Akguel, Anna Sophie Bartel, Jana Fremming, Marie-Theres Mueller, Luise Reihe, Frederike Stapela, Jan-Paul Splett, Nicole Spann	TOXICITY IN RELATION TO MODE OF ACTION FOR THE NEMATODE CAENORHABDITIS ELEGANS: ACUTE-TO-CHRONIC RATIOS AND QUANTITATIVE STRUCTURE–ACTIVITY RELATIONSHIPS	Environmental Toxicology and Chemistry	10.1002/etc.3069		9	Acute-to-chronic ratios (ACRs) and quantitative structure-activity relationships (QSARs) are of particular interest in chemical risk assessment. Previous studies focusing on the relationship between the size or variation of ACRs to substance classes and QSAR models were often based on data for standard test organisms, such as daphnids and fish. In the present study, acute and chronic toxicity tes…	Assessment factor, Extrapolation, Acute-to-chronic ratio, Quantitative structure–activity relationship, Risk assessment	Lab experiment			Celegans
2015	Nicole Spann, Willem Goedkoop, Walter Traunspurger	Phenanthrene Bioaccumulation in the Nematode Caenorhabditis elegans	Environmental Science and Technology	10.1021/es504553t	17	3	The contribution of food to the bioaccumulation of xenobiotics and hence toxicity is still an ambiguous issue. It is becoming more and more evident that universal statements cannot be made, but that the relative contribution of food- associated xenobiotics in bioaccumulation depends on species, substance, and environmental conditions. Yet, small-sized benthic or soil animals such as nematodes hav…	Caenorhabditis elegans; Phenanthrene; Bioaccumulation; Food	Lab experiment			Celegans		https://pubs.acs.org/doi/pdf/10.1021/es504553t
2015	Sebastian Höss, Béatrice Frank-Fahle, Tillmann Lueders, Walter Traunspurger	Response of bacteria and meiofauna to iron oxide colloids in sediments of freshwater microcosms	Environmental Toxicology and Chemistry	10.1002/etc.3091	6	4	The use of colloidal iron oxide (FeOx) in the bioremediation of groundwater contamination implies its increasing release into the environment and requires an assessment of its ecotoxicological risk. Therefore, microcosm experiments were carried out to investigate the impact of ferrihydrite colloids on the bacterial and meiofaunal communities of pristine freshwater sediments. The effects of ferrih…	Iron oxide colloids; Meiofauna; Nematodes; Bacteria; Microcosms	Lab experiment	4267	51	Eumonhystera_simplex; Eumonhystera_pseudobulbosa; Eumonhystera_vulgaris; Eumonhystera_longicaudatula; Eumonhystera_barbata;		https://api.wiley.com/onlinelibrary/tdm/v1/articles/10.1002%2Fetc.3091
2015	Patricia Gilarte, Bianca Kreuzinger-Janik, Nabil Majdi, Walter Traunspurger	Life-History Traits of the Model Organism Pristionchus pacificus Recorded Using the Hanging Drop Method: Comparison with Caenorhabditis elegans	PLOS ONE	10.1371/journal.pone.0134105	6	4	The nematode Pristionchus pacificus is of growing interest as a model organism in evolutionary biology. However, despite multiple studies of its genetics, developmental cues, and ecology, the basic life-history traits (LHTs) of P. pacificus remain unknown. In this study, we used the hanging drop method to follow P. pacificus at the individual level and thereby quantify its LHTs. This approach all…		Lab experiment			Pristionchus_pacificus		http://dx.plos.org/10.1371/journal.pone.0134105
2015	Christoph Ptatscheck, Bianca Kreuzinger-Janik, Henrike Putzki, Walter Traunspurger	Insights into the importance of nematode prey for chironomid larvae	Hydrobiologia	10.1007/s10750-015-2246-9	17	4	The potential predatory ability of Chironomus riparius, well-known detritus-feeding chironomid larvae, on nematodes was investigated in a series of laboratory experiments. We analyzed the consumption rate (i) for different prey densities of adult and juvenile Caenorhabditis elegans (25–1200 and 25–2400 prey individuals, respectively), (ii) for different substrates (detritus, sand, and gravel), an…	Benthos; Food web; Nematodes; Meiofauna; Deposit feeder; Functional response	Lab experiment		48	Trischistoma_monohystera		http://link.springer.com/content/pdf/10.1007/s10750-015-2246-9.pdf
2015	Nabil Majdi, Walter Traunspurger	Free-living nematodes in the freshwater food web: a review	Journal of Nematology	PMCID: PMC4388577	121		Free-living nematodes are well-recognized as an abundant and ubiquitous component of benthic communities in inland waters. Compelling evidence from soil and marine ecosystems has highlighted the importance of nematodes as trophic intermediaries between microbial production and higher trophic levels. However, the paucity of empirical evidence of their role in freshwater ecosystems has hampered the…	algae, bacteria, ecology, fish, food web, free-living, freshwater, fungi, interaction, macrofauna, meiofauna, method, organic matter, predation, protozoa, selectivity	Literature review
2015	Arne Hägerbäumer, Sebastian Höss, Peter Heininger, Walter Traunspurger	Experimental studies with nematodes in ecotoxicology: An overview	Journal of Nematology	PMCID: PMC4388577	87		With respect to their high abundances, their role as intermediaries between microorganisms and higher trophic levels, and their ubiquitous occurrence in all habitats, nematodes are of strong potential interest as environmental indicators. Ecotoxicological methods to evaluate the risk of anthropogenic pollutants on ecosystems require both in vitro and in vivo toxicity tests to investigate either m…	chemicals, contamination, ecology, ecotoxicology, free-living, freshwater, marine, methods, microcosms, model ecosystems, molecular, NemaSPEAR[%] index, review, single species, soil	Literature review
2016	Sebastian Weber, Walter Traunspurger	Effects of juvenile fish predation (Cyprinus carpio L.) on the composition and diversity of free-living freshwater nematode assemblages	Nematology	10.1163/15685411-00002941	11	2	Free-living nematodes are well recognised as an abundant and ubiquitous component of meiobenthic communities, where they serve as a link between microbial production and higher trophic levels. However, the effect of fish predation on nematode assemblages is almost unknown. In this study, the predation effects of the benthivorous juvenile carp (Cyprinus carpio) on nematode abundance, biomass, dive…	carp; Eumonhystera filiformis; food web; Monhystera paludicola; Monhystera stagnalis; recovery; Tobrilus gracilis	Field experiment	15069	34	Tobrilus_gracilis	Germany	https://brill.com/view/journals/nemy/18/1/article-p39_5.xml
2016	Janina Schenk, Walter Traunspurger, Kai Ristau	Genetic diversity of widespread moss-dwelling nematode species in German beech forests	European Journal of Soil Biology	10.1016/j.ejsobi.2016.03.002	7	3	Molecular studies suggest that the number of microscopic animal species has been severely underestimated because of a high level of cryptic diversity. Using traditional methods of morphological species identification, a large number of species have remained undetected. In fact, many aquatic nematode morphospecies with an assumed widespread distribution instead may comprise cryptic species complex…	Cryptic diversity; Free-living nematodes; Plectidae; Molecular diversity; Geographic distribution	Field survey		20	Plectus_parietinus; Plectus_cirratus; Chiloplectus_andrassyi	Germany	https://api.elsevier.com/content/article/PII:S116455631630019X
2016	Nabil Majdi, Ilka Threis, Walter Traunspurger	It's the little things that count: Meiofaunal density and production in the sediment of two headwater streams	Limnology and Oceanography	10.1002/lno.10382	38	3	The distribution of biomass production and its allocation across populations under environmental constraints draw a picture of community dynamics and energy flows in ecosystems. However, microscopic benthic invertebrates (meiofauna) are often overlooked in stream production budgets. We monitored the meiofauna dwelling in the sediment at two headwater stream sites (Ems and Furlbach, NW Germany) du…		Field survey				Germany	https://api.wiley.com/onlinelibrary/tdm/v1/articles/10.1002%2Flno.10382
2016	Birgit Dümmer, Kai Ristau, Walter Traunspurger	Varying Patterns on Varying Scales: A Metacommunity Analysis of Nematodes in European Lakes	PLOS ONE	10.1371/journal.pone.0151866	13	3	Ecological community patterns are often extremely complex and the factors with the greatest influence on community structure have yet to be identified. In this study we used the elements of metacommunity structure (EMS) framework to characterize the metacommunities of freshwater nematodes in 16 European lakes at four geographical scales (radius ranging from 80 m to 360 km). The site characteristi…		Field survey	9000	174	Eumonhystera_vulgaris; Prodesmodora_circulata; Tobrilus_gracilis; Tripyla_glomerans	Germany; Sweden	http://dx.plos.org/10.1371/journal.pone.0151866
2016	Gerhard Zotz, Walter Traunspurger	What´s in the tank? Nematodes and other major components of the meiofauna of bromeliad phytotelms in lowland Panama	BMC Ecology	10.1186/s12898-016-0069-9	8	2	Background: Nematodes are a very diverse and extremely abundant group of animals, but their occurrence in the tropics is surprisingly little understood. We investigated the meiofauna of epiphytic tank bromeliads in the lowlands of Panama with particular emphasis on nematodes. Results: We encountered 89 morphospecies of nematodes in 54 bromeliad tanks, which were sampled in the wet and the dry sea…	Barro Colorado island; Bromeliaceae; Habitat size; Island biogeography; Nematodes; Phytotelms; Rotatoria; Werauhia sanguinolenta	Field survey	89		Prismatolaimus_intermedius	Panama	http://link.springer.com/content/pdf/10.1186/s12898-016-0069-9
2016	Arne Haegerbaeumer, Sebastian Höss, Kai Ristau, Evelyn Claus, Christel Möhlenkamp, Peter Heininger, Walter Traunspurger	A comparative approach using ecotoxicological methods from single-species bioassays to model ecosystems	Environmental Toxicology and Chemistry	10.1002/etc.3482	14	7	Soft sediments are often hotspots of chemical contamination, and a thorough ecotoxicological assessment of this habitat can help to identify the causes of stress and to improve the health ofthe respective ecosystems. As an important component ofthe ecologically relevant meiobenthic fauna, nematodes can be used for sediment assessments, with various assay tools ranging from single-species toxicity…	Sediment toxicity; Microcosms; Caenorhabditis elegans; Nematodes; Zinc	Lab experiment	1740	46	Eumonhystera_filiformis; Dorylaimus_stagnalis; Ironus_ignavus; Ironus_macaramphis; Monhystera_paludicola; Monhystera_stagnalis; Tripyla_setifera;		https://api.wiley.com/onlinelibrary/tdm/v1/articles/10.1002%2Fetc.3482
2016	Sebastian Weber, Walter Traunspurger	Influence of the ornamental red cherry shrimp Neocaridina davidi (Bouvier, 1904) on freshwater meiofaunal assemblages	Limnologica	10.1016/j.limno.2016.06.001	18	2	Meiofauna serves as a link between microbial production and higher trophic levels, such as macroinvertebrates and juvenile fish. However, the role of meiofauna in the freshwater food web has not been accurately evaluated, and the influence of shrimp predation on freshwater meiofaunal assemblages is unknown. In this study, the predation effects of Neocaridina davidi, an ornamental freshwater shrim…	Aquaculture; Food web; Meiobenthos; Neozoa; Predator-prey interactions; Secondary production	Lab experiment					https://api.elsevier.com/content/article/PII:S0075951116300354
2016	Nabil Majdi, Bianca Kreuzinger-Janik, Walter Traunspurger	Effects of flatworm predators on sediment communities and ecosystem functions: a microcosm approach	Hydrobiologia	10.1007/s10750-016-2751-5	8	3	Predators affect prey and non-prey communities through consumptive effects (CE) and non-consumptive effects (NCE), with consequences for ecosystem functions. Aquatic sediments are entanglements of particles that house diverse communities of microbes and invertebrates involved in ecosystem functions. In this study, we used experimental sediment cores as microcosms to explore the effects of two pre…	predator-prey interaction; bioturbation; nutrient cycling; path modelling; engineering effects; meiofauna; macrofauna	Lab experiment					http://link.springer.com/content/pdf/10.1007/s10750-016-2751-5.pdf
2016	Nabil Majdi, Iris C. Michiels, Walter Traunspurger	Resource depletion affects the structure of an experimental benthic food web	Limnologica	10.1016/j.limno.2016.03.009	4	3	In this study, we investigated the long-term (2-year) response of a detritus-based food web to resource depletion simulated in microcosms filled with lake sediment. The effects of resource depletion on the food web were estimated from the biomass responses of a simplified, size-based trophic network comprising three trophic levels: (1) bacteria, (2) bacterivorous meiofauna, and (3) omnivore/preda…	Detrital ecosystems; Trophic dynamics; Meiofauna; Omnivory; Sediment	Lab experiment; field survey	25000		Eumonhystera_pseudobulbosa; Dorylaimus_stagnalis; Epitobrilus_stefanskii; Tobrilus_gracilis; Monhystera_stagnalis; Monhystera_paludicola	Germany	https://api.elsevier.com/content/article/PII:S0075951116300263
2016	M.F. Geiger, J.J. Astrin, T. Borsch, U. Burkhardt, P. Grobe, R. Hand, A. Hausmann, K. Hohberg, L. Krogmann, M. Lutz, C. Monje, B. Misof, J. Morinière, K. Müller, S. Pietsch, D. Quandt, B. Rulik, M. Scholler, W. Traunspurger, G. Haszprunar, W. Wägele	How to tackle the molecular species inventory for an industrialized nation—lessons from the first phase of the German Barcode of Life initiative GBOL (2012–2015)	Genome	10.1139/gen-2015-0185	32	21	Biodiversity loss is mainly driven by human activity. While concern grows over the fate of hot spots of biodiversity, contemporary species losses still prevail in industrialized nations. Therefore, strategies were formulated to halt or reverse the loss, driven by evidence for its value for ecosystem services. Maintenance of the latter through conservation depends on correctly identified species. …	biodiversity assessment; citizen science; DNA barcoding; reference library; Germany	Literature review				Germany	http://www.nrcresearchpress.com/doi/full-xml/10.1139/gen-2015-0185
2017	Nabil Majdi, Walter Traunspurger	Leaf fall affects the isotopic niches of meiofauna and macrofauna in a stream food web	Food Webs	10.1016/j.fooweb.2017.01.002	11	2	The dynamics of resource subsidies in small forested streams fluctuate seasonally and reflect donor-controlled linkage between terrestrial and aquatic ecosystems. Here we ask whether and how complex communities adjust their diet in response to the pulses of leaf litter reaching streams every year in autumn. Answers to these ques- tions were sought in a seasonal comparison of the isotopic niches o…	Stable isotopes; trophic niche; Bayesian inference; stream ecology; meiobenthos	Field experiment				Germany	https://api.elsevier.com/content/article/PII:S2352249616300258
2017	S. Höss, P. Heininger, E. Claus, C. Möhlenkamp, M. Brinke, W. Traunspurger	Validating the NemaSPEAR[%]-index for assessing sediment quality regarding chemical-induced effects on benthic communities in rivers	Ecological Indicators	10.1016/j.ecolind.2016.09.022	21	6	Fine, cohesive sediments provide a habitat for a very diverse fauna and considerably contribute to important ecosystem services of aquatic ecosystems. As fine sediments are often hotspots of chemical contamination, the benthic fauna has to be protected in order to maintain its ecological functioning and thereby the proper provision of important ecosystem services. However, in these habitats usual…	Fine sediments; Nematodes; NemaSPEAR[%]; Sediment management; EU WFD	Field survey	11579	226	Eumonhystera_filiformis; Tobrilus_gracilis; Eumonhystera_vulgaris; Semitobrilus_pellucidus; Monhystera_stagnalis; Dorylaimus_stagnalis; Daptonema_dubium; Eumonhystera_longicaudatula	Germany	https://api.elsevier.com/content/article/PII:S1470160X16305532
2017	Walter Traunspurger, Nicola Reiff, Valentyna Krashevska, Nabil Majdi, Stefan Scheu	Diversity and distribution of soil micro-invertebrates across an altitudinal gradient in a tropical montane rainforest of Ecuador, with focus on free-living nematodes	Pedobiologia	10.1016/j.pedobi.2017.04.003	12	5	Here we describe the community structure of soil micro-invertebrates at three altitudes (1000, 2000, and 3000 m) and two soil layers (upper L/F layer and deeper H/Ah layer) of a tropical montane rainforest situated on the eastern slope of the Andes (southern Ecuador) with special focus on nematodes. Nematodes dominated the micro-invertebrate assemblage (average density 1.82 × 105 ind. m−2), accom…	Biodiversity; Assemblage structure; Trophic ecology; Tropical rain forest; Andes	Field survey	1217	143	Tylencholaimus_stekki	Ecuador	https://api.elsevier.com/content/article/PII:S0031405617300306
2017	Janina Schenk, Karin Hohberg, Johannes Helder, Kai Ristau, Walter Traunspurger	The D3-D5 region of large subunit ribosomal DNA provides good resolution of German limnic and terrestrial nematode communities	Nematology	10.1163/15685411-00003089	6	5	Reliable and well-developed DNA barcode databases are indispensable for the identification of microscopic life. However, effectiveness of molecular barcoding in identifying terrestrial specimens, and nematodes in particular, has received little attention. In this study, ca 600 ribosomal large subunit DNA fragments (D3-D5 region) were successfully amplified for 79 limnic and terrestrial nematode s…	barcoding; diversity; German barcode of life; large ribosomal subunit; limno-terrestrial nematodes; molecular barcode	Field survey	600	79		Germany	https://brill.com/view/journals/nemy/19/7/article-p821_5.xml
2017	Guillermo de Mendoza, Walter Traunspurger, Alejandro Palomo, Jordi Catalan	Nematode distributions as spatial null models for macroinvertebrate species richness across environmental gradients: A case from mountain lakes	Ecology and Evolution	10.1002/ece3.2842	7	4	Nematode species are widely tolerant of environmental conditions and disperse passively. Therefore, the species richness distribution in this group might largely depend on the topological distribution of the habitats and main aerial and aquatic dispersal pathways connecting them. If so, the nematode species richness distributions may serve as null models for evaluating that of other groups more a…	biodiversity; Chironomidae; Insecta; mountain lakes; Nematoda; Oligochaeta; Pyrenees	Field survey	4000	31	Dorylaimus _stagnalis	Spain; France	https://api.wiley.com/onlinelibrary/tdm/v1/articles/10.1002%2Fece3.2842
2017	Cansu Arican, Walter Traunspurger, Nicole Spann	The influence of thiacloprid on the feeding behaviour of the copepod, Diacyclops bicuspidatus, preying on nematodes	Nematology	10.1163/15685411-00003118	4	3	Nowadays, neonicotinoids are the most widespread insecticides. As neurotoxins with high toxicity to many arthropods, they provide effective pest control, but it also became apparent that they are impacting non-target organisms in freshwater habitats. This study investigated the influence of the neonicotinoid thiacloprid on the behaviour of the copepod, Diacyclops bicuspidatus, feeding on differen…	Caenorhabditis elegans; ecotoxicology; meiofauna; neonicotinoids; Panagrolaimus sp.; Plectus aquatilis; predator-prey; toxicity	Lab experiment	2700	29	Celegans; Panagrolaimus; Plectus_aquatilis; Dorylaimus_stagnalis; Eumonhystera_filiformis; Semitobrilus_pellucidus		https://brill.com/view/journals/nemy/19/10/article-p1201_6.xml
2017	Bianca Kreuzinger-Janik, Marvin Brinke, Walter Traunspurger, Nabil Majdi	Life history traits of the free-living nematode, Plectus acuminatus Bastian, 1865, and responses to cadmium exposure	Nematology	10.1163/15685411-00003077	5	4	Free-living nematodes are ubiquitous and play an essential role in ecosystems. However, little is known about their standard life history traits (LHTs), which limits their inclusion in estimations of energy flows and carrying capacities of ecosystems, as well as in modelling population-level responses to toxicants. Thus, we used the hanging-drop method to measure LHTs of Plectus acuminatus with a…	fertility; hanging-drop; heavy metal; life-cycle; lifespan; population growth; reproduction	Lab experiment			Plectus_acuminatus		https://brill.com/view/journals/nemy/19/6/article-p645_2.xml
2017	C. Ptatscheck, H. Putzki, W. Traunspurger	Impact of deposit-feeding chironomid larvae ( Chironomus riparius ) on meiofauna and protozoans	Freshwater Science	10.1086/694461	10	3	Abstract:Chironomid larvae are common members of benthic systems in freshwaters. Their diet consists mainly ofdetritus, which often leads to the passive ingestion of attached organisms. We hypothesized that larvae would havea strong trophic effect on protozoans and meiofauna. We investigated experimentally the direct effect of 2 densities(1 and 4 larvae/16 cm2)ofChironomus riparius, a nonselectiv…	zoobenthos; food web; meiofauna; detritus feeding; microzoobenthos; nonselective feeding	Lab experiment					http://www.journals.uchicago.edu/doi/pdf/10.1086/694461
2017	Arne Haegerbaeumer, Sebastian Höss, Peter Heininger, Walter Traunspurger	Is Caenorhabditis elegans representative of freshwater nematode species in toxicity testing?	Environmental Science and Pollution Research	10.1007/s11356-017-0714-7	16	4	Multi-species toxicity tests were conducted using a broad range offreshwater nematode species to assess interspe- cific differences in sensitivity to chemical stress and to com- pare the toxicity to that on the standard test organism Caenorhabditis elegans. The lethal effects of nine different chemical treatments, including metals and polycyclic aromatic hydrocarbons (PAHs) in single and mixture …	Acute toxicity; Sediment; Metals; PAHs; Chemical mixtures; Multi-species;	Lab experiment	5500	107			http://link.springer.com/content/pdf/10.1007/s11356-017-0714-7.pdf
2017	Sebastian Weber, Walter Traunspurger	Invasive red swamp crayfish ( Procambarus clarkii ) and native noble crayfish ( Astacus astacus ) similarly reduce oligochaetes, epipelic algae, and meiofauna biomass: a microcosm study	Freshwater Science	10.1086/690556	8	2	Abstract:Human activities have led to the decline of native crayfish and promoted dispersion of invasive speciesin European freshwater ecosystems. Crayfish are well-known predators of benthic macroinvertebrates, but benthiccommunities in aquatic ecosystems also include an abundant and functionally important meiofaunal component.For these organisms, the effects of invasive and native crayfish spec…	food web; invasive species; invertebrates; meiobenthos; neozoa	Lab experiment					https://www.journals.uchicago.edu/doi/pdf/10.1086/690556
2017	Arne Haegerbaeumer, Sebastian Höss, Kai Ristau, Evelyn Claus, Peter Heininger, Walter Traunspurger	The use of meiofauna in freshwater sediment assessments: Structural and functional responses of meiobenthic communities to metal and organics contamination	Ecological Indicators	10.1016/j.ecolind.2017.03.048	7	6	Because soft sediments are often hotspots of chemical contamination, their assessment can aid in identi- fying the causes of environmental stress and the implementation of measures to improve the health of the respective ecosystems. Achieving a “good ecological status” of surface waters, as required by the European Water Framework Directive, strongly depends on recognition of the chemical status …	Sediment; Metals; PAHs; Meiofauna; Model ecosystems; Caenorhabditis elegans	Lab experiment					https://api.elsevier.com/content/article/PII:S1470160X17301668
2017	Gerhard Du Preez, Nabil Majdi, Antoinette Swart, Walter Traunspurger, Hendrika Fourie	Nematodes in caves: a historical perspective on their occurrence, distribution and ecological relevance	Nematology	10.1163/15685411-00003068	12	5	Caves and cave-dwelling biota have fascinated scientists for centuries. Nevertheless, there is a considerable lack of information on subterranean realms and the ecosystems they host. Nematoda, for example, is a group of invertebrates that plays an important role in the functioning of epigean ecosystems, but whether or not the same is true for subterranean ecosystems remains unknown. For this reas…	biodiversity; biospeleology; cave-dwelling nematodes; ecology; subterranean ecosystems; troglobiont	Literature review		295		Global	https://brill.com/view/journals/nemy/19/6/article-p627_1.xml
2018	Anne Th. Sonne, Jes J. Rasmussen, Sebastian Höss, Walter Traunspurger, Poul L. Bjerg, Ursula S. McKnight	Linking ecological health to co-occurring organic and inorganic chemical stressors in a groundwater-fed stream system	Science of The Total Environment	10.1016/j.scitotenv.2018.06.119	10	6	Freshwaters are among the most endangered ecosystems worldwide, due predominantly to excessive anthropogenic practices compromising the future provisioning of ecosystem services. Despite increased awareness of the role of multiple stressors in accounting for ecological degradation in mixed land-use stream systems, risk assessment approaches applicable in field settings are still required. This st…	Benthic invertebrate communities; Biogeochemistry; Ecological assessment; Groundwater-stream water interaction; Mixed land-use stream systems; Multiple chemical stressors.	Field experiment				Denmark	https://api.elsevier.com/content/article/PII:S0048969718321958
2018	Sebastian Weber, Nabil Majdi, Walter Traunspurger	Effects of bottom-feeding fish juveniles on the vertical distribution of a meiofaunal community	Hydrobiologia	10.1007/s10750-018-3658-0	4	3	The distribution pattern of benthic meiofauna in freshwater ecosystems reflects a trade-off between residences in the high-risk, but productive, sediment surface versus the safer, but physiologically harsher, conditions deeper in the sediment. In this study, we used field enclosures and exclosures in a natural freshwater pond to investigate the effects of the juvenile common carp (Cyprinus carpio…	Cyprinus carpio; Food-web; Meiobenthos; Top-down control; Vertical distribution	Field experiment				Germany	http://link.springer.com/content/pdf/10.1007/s10750-018-3658-0.pdf
2018	Christoph Ptatscheck, Birgit Gansfort, Walter Traunspurger	The extent of wind-mediated dispersal of small metazoans, focusing nematodes	Scientific Reports	10.1038/s41598-018-24747-8	30	3	Wind-mediated transport is an important mechanism in the dispersal of small metazoans. Yet, concrete dispersal rates have hardly been examined. Here we present the results of an one-year field experiment investigating the composition and dispersal rates of aeroplankton. To gain insights into the dynamics of dispersal at the species level, we focused on nematodes, worldwide the most common metazoa…		Field survey	594	27	Chiloplectus_andrassyi	Germany	http://www.nature.com/articles/s41598-018-24747-8.pdf
2018	Christoph Ptatscheck, Patrick Connor Milne, Walter Traunspurger	Is stemflow a vector for the transport of small metazoans from tree surfaces down to soil?	BMC Ecology	10.1186/s12898-018-0198-4	18	3	Abstract Background Stemflow is an essential hydrologic process shaping the soil of forests by providing a concentrated input of rainwater and solutions. However, the transport of metazoans by stemflow has yet to be investigated. This 8-week study documented the organisms (< 2 mm) present in the stemflow of different tree species. Because the texture of the tree bark is a crucial determination of…	Forest ecosystems; Forest soil; Canopy; Nematodes; Rotifers; Collembolans	Field survey	712	15	Chiloplectus_andrassyi; Laimaphelenchus_penardi	Germany	http://link.springer.com/content/pdf/10.1186/s12898-018-0198-4.pdf
2018	Birgit Gansfort, Walter Traunspurger, Ilka Threis, Nabil Majdi	Wide variation in a tiny space: The microdistribution of meiobenthos in an artificial pond	Freshwater Biology	10.1111/fwb.13078	6	4	Meiofauna play an important ecological role in benthic ecosystems. However, little is known about their small-scale (<1 m2) distribution. Yet, this knowledge has both theoretical implications, by improving our understanding of how processes generate patterns; and practical outcomes by improving sampling designs. 2. The goal of this study was to obtain insights into the small-scale distribution of…	rotifers; Moran’s I; nematodes; patch sizes; small scale	Field survey	14346	11	Eumonhystera_filiformis; Monhystera _paludicola	Germany	https://api.wiley.com/onlinelibrary/tdm/v1/articles/10.1111%2Ffwb.13078
2018	Bianca Kreuzinger-Janik, Sonja Kruscha, Nabil Majdi, Walter Traunspurger	Flatworms like it round: nematode consumption by Planaria torva (Müller 1774) and Polycelis tenuis (Ijima 1884)	Hydrobiologia	10.1007/s10750-018-3642-8	10	4	The aim of this study was to enhance current knowledge of thus far largely neglected meiofaunalÐmacrofaunal trophic channels in freshwater ecosystems. The strength and shape (functional response) of the predatorÐprey interaction between two freshwater triclad flatworm species (Polycelis tenuis and Planaria torva) and individuals of the nematode species Caenorhabditis elegans were measured in a se…	Functional response; Food web; Predator–prey; Meiofauna; Type III	Lab experiment			Celegans		http://link.springer.com/content/pdf/10.1007/s10750-018-3642-8.pdf
2018	Hendrik Fueser, Nabil Majdi, Arne Haegerbaeumer, Christian Pilger, Henning Hachmeister, Paul Greife, Thomas Huser, Walter Traunspurger	Analyzing life-history traits and lipid storage using CARS microscopy for assessing effects of copper on the fitness of Caenorhabditis elegans	Ecotoxicology and Environmental Safety	10.1016/j.ecoenv.2018.03.037	8	8	The water-soluble fraction (WSF) of an oil contains different classes of petroleum hydrocarbons and, despite their low potential for bioaccumulation, these can be highly toxic to biota. Nematodes are usually the most abundant and species-rich group of metazoans in marine and freshwater sediments as well as terrestrial soils and have been proposed as excellent models to monitor pollution effects. …	Life-cycle; Lifespan; Heavy metal; Hanging-drop method; Lipid droplets; Coherent Anti-stokes Raman Scattering microscopy	Lab experiment			Celegans		https://api.elsevier.com/content/article/PII:S0147651318302252
2018	Nabil Majdi, Sebastian Weber, Walter Traunspurger	The early catfish catches the worm: predation of Corydoras aeneus (Siluriformes, Callichthyidae) on freshwater nematodes	Annales de Limnologie - International Journal of Limnology	10.1051/limn/2018019	1	3	In this study, we measured the daily consumption of four different nematode species by a small freshwater catfish species, Corydoras aeneus (Gill, 1858). Consumption of nematodes by fishes was significant with a single C. aeneus individual being able to consume in 24 h between 40 581 and 75 849 adult nematodes depending on the nematode species offered. This represented the ingestion of up to 238 …	Predator-prey interaction; Aquaculture; Benthic ecology; Caenorhabditis elegans; Panagrellus redivivus	Lab experiment			Celegans, Panagrellus_redivivus; Poikilomaimus_sp; Panagrolaimus_thienemanni		https://www.limnology-journal.org/10.1051/limn/2018019/pdf
2018	Luana Monteiro, Walter Traunspurger, Kevin Roeleveld, Frederic Lynen, Tom Moens	Direct toxicity of the water-soluble fractions of a crude and a diesel-motor oil on the survival of free-living nematodes	Ecological Indicators	10.1016/j.ecolind.2018.04.066	9	5	The water-soluble fraction (WSF) of an oil contains different classes of petroleum hydrocarbons and, despite their low potential for bioaccumulation, these can be highly toxic to biota. Nematodes are usually the most abundant and species-rich group of metazoans in marine and freshwater sediments as well as terrestrial soils and have been proposed as excellent models to monitor pollution effects. …	Mortality assays; Nematodes; Oil pollution; Taxonomic relatedness; Test sentinels; Water-soluble fraction	Lab experiment			Diplolaimella ; Diplolaimelloides_oschei ; Diplolaimelloides_meyli ; Litoditis_marina ; Celegans ; Bursilla_monhystera ; Poikilolaimus ; Panagrellus_redivivus ; Paroigolaimella_bernensis ; Plectus_aquatilis		https://api.elsevier.com/content/article/PII:S1470160X18303194
2018	Arne Haegerbaeumer, Sebastian Höss, Peter Heininger, Walter Traunspurger	Response of nematode communities to metals and PAHs in freshwater microcosms	Ecotoxicology and Environmental Safety	10.1016/j.ecoenv.2017.10.030	14	4	Freshwater microcosms were used to investigate the effects of various metals and polycyclic aromatic hydro- carbons (PAHs), applied as single substances and in mixtures, on sediment-inhabiting nematode assemblages. Several community measures, including nematode abundance, biomass, species richness, species composition and the NemaSPEAR[%]-index, were assessed and their changes in response to the …	Sediment; toxicity; Metals; PAHs; Caenorhabditis elegans; Model ecosystems; Bioindication; Nematodes	Lab experiment	12000	64	Eumonhystera_vulgaris; Tripyla_setifera; Eumonhystera_longicaudatula; Ironus_macramphis; Monhystera_stagnalis; Eumonhystera_pseudobulbosa; Achromadora_terricola; Eumonhystera_barbata		https://api.elsevier.com/content/article/PII:S0147651317307017
2018	Luana C. Monteiro, Jana Van Butsel, Nele De Meester, Walter Traunspurger, Sofie Derycke, Tom Moens	Differential heavy-metal sensitivity in two cryptic species of the marine nematode Litoditis marina as revealed by developmental and behavioural assays	Journal of Experimental Marine Biology and Ecology	10.1016/j.jembe.2017.05.016	16	6	The distribution pattern of benthic meiofauna in freshwater ecosystems reflects a trade-off between residences in the high-risk, but productive, sediment surface versus the safer, but physiologically harsher, conditions deeper in the sediment. In this study, we used field enclosures and exclosures in a natural freshwater pond to investigate the effects of the juvenile common carp (Cyprinus carpio…	Heavy metals; cryptic species; Litoditis marina; growth; fecundity; behavior	Lab experiment			Litoditis_marina		https://api.elsevier.com/content/article/PII:S0022098117303118
2018	Birgit Gansfort, Jana Uthoff, Walter Traunspurger	Interactions among competing nematode species affect population growth rates	Oecologia	10.1007/s00442-018-4109-3	8	3	Investigations of the interplay of organisms in an ecological community are a prerequisite to understanding the processes that shape the structures of those communities. Among several types of interactions, interest in the positive interactions of species that compete for the same resource has grown, as they may provide a mechanism enabling coexistence. In the laboratory experiment described here…	Positive interaction; Population growth; Coexistence; Combined cultures; GLMM	Lab experiment			Panagrolaimus_thienemanni; Poikilolaimus_regenfussi		http://link.springer.com/content/pdf/10.1007/s00442-018-4109-3.pdf
2018	Markus Weitere, Martina Erken, Nabil Majdi, Hartmut Arndt, Helge Norf, Michael Reinshagen, Walter Traunspurger, Anja Walterscheid, Jennifer K. Wey	The food web perspective on aquatic biofilms	Ecological Monographs	10.1002/ecm.1315	48	9	Biofilms, the complex communities of microbiota that live in association with aquatic interfaces, are considered to be hotspots of microbial life in many aquatic ecosystems. Although the importance of attached algae and bacteria is widely recognized, the role of the highly abundant biofilm-dwelling micrograzers (i.e., heterotrophic protists and small metazoans) is poorly understood. Studies often…	Biofilm grazing; Biogeochemical processes; Microbial food web interactions; Periphyton; Protozoans; Trait-based interactions	Literature review					https://api.wiley.com/onlinelibrary/tdm/v1/articles/10.1002%2Fecm.1315
2019	Urs Christian Gießelmann, Nils Borchard, Walter Traunspurger, Klaudia Witte	Long-term effects of charcoal on nematodes and other soil meso- and microfaunal groups at historical kiln-sites – a pilot study	European Journal of Soil Biology	10.1016/j.ejsobi.2019.103095	6	4	Charcoal additions considerably alter the chemical and physical properties of soil. However, direct and indirect charcoal-induced effects on soil biota, particularly on meso- and micro-invertebrates are scarcely assessed. This pilot study aimed to investigate abundances of meso- and micro-invertebrates, particularly free-living nematodes, in soil and decaying leaf litter on ancient charcoal kiln …	Biochar; Charcoal; Nematodes; Kiln soil; Rotifers; Annelids	Field experiment	3000			Gemany	https://api.elsevier.com/content/article/PII:S1164556319300548
2019	Birgit Gansfort, Walter Traunspurger	Environmental factors and river network position allow prediction of benthic community assemblies: A model of nematode metacommunities	Scientific Reports	10.1038/s41598-019-51245-2	7	2	The field of metacommunity studies is growing rapidly, including recent applications to river networks. Most of these studies have targeted a single river network but whether their findings are relevant to other river systems is unknown. This study investigated the influence of environmental, spatial and temporal parameters on the community structure of nematodes in the river networks of the Elbe…		Field survey	12370	314	Eumonhystera _filiformis; Tobrilus_gracilis	Germany	http://www.nature.com/articles/s41598-019-51245-2.pdf
2019	H Brüchner-Hüttemann, C Ptatscheck, W Traunspurger	Unicellular organisms in benthic habitats on different substrates in a first-order stream and their contribution to secondary production	Aquatic Microbial Ecology	10.3354/ame01903	3	3	Heavy metals are persistent pollutants, the concentrations of which have increased in many natural environments as a result of anthropogenic activities. Accumulation of heavy metals in coastal benthic habitats is common. Nematoda are the most abundant and species-rich phylum in these benthic habitats, and shifts in their assemblage composition are considered good indicators of environmental chang…	Protozoa; Bacteria; Seasonal dynamics; Sediment; Dead wood; Macrophyte; Leaf litter	Field survey				Germany	https://www.int-res.com/articles/ame2019/83/a083p049.pdf
2019	Hendrik Fueser, Marie-Theres Mueller, Linette Weiss, Sebastian Höss, Walter Traunspurger	Ingestion of microplastics by nematodes depends on feeding strategy and buccal cavity size	Environmental Pollution	10.1016/j.envpol.2019.113227	45	5	Microplastics are hardly biodegradable and thus accumulate rather than decompose in the environment. Due to sedimentation processes, meiobenthic fauna is exposed to microplastics. Within the meiofauna, nematodes are a very abundant taxon and occupy an important position in benthic food webs by connecting lower and higher trophic levels. However, the key determinants of the uptake of microplastics…	Microspheres; Polystyrene; Uptake; Exposure time; Exposure concentration	Lab experiment			Celegans; Pristionchus_pacificus; Aphelenchoides_parietinus; Plectus_acuminatus; Acrobeloides_nanus; Poikilolaimus_regenfussii; Panagrolaimus_thienemanni		https://api.elsevier.com/content/article/PII:S0269749119322481
2019	Arne Haegerbaeumer, Ricarda Raschke, Nicola Reiff, Walter Traunspurger, Sebastian Höss	Comparing the effects of fludioxonil on non-target soil invertebrates using ecotoxicological methods from single-species bioassays to model ecosystems	Ecotoxicology and Environmental Safety	10.1016/j.ecoenv.2019.109596	6	5	The lower tier toxicity tests used for risk assessment of plant protection products are conducted with single species, only regarding direct effects of the tested substances. However, it is not clear, if lower tier tests are able to protect in situ soil communities, as these tests are not able to account for direct and indirect effects of che- micals on multi-species systems in natural soil commu…	Plant protection products; Soil; Caenorhabditis elegans; Nematodes; Risk Assessment	Lab experiment	1775	70	Aporcelaimellus; Alaimus; Protorhabditidae; Tylenchidae; Gracilacus		https://api.elsevier.com/content/article/PII:S0147651319309273
2019	Julie Neury‐Ormanni, Caroline Doose, Nabil Majdi, Jacky Vedrenne, Soizic Morin, Sebastian Höss, Walter Traunspurger	Tolerance of free‐living nematode species to imidacloprid and diuron	Invertebrate Biology	10.1111/ivb.12272	3	7	Lipid storage provides energy for cell survival, growth, and reproduction and is closely related to the organismal response to stress imposed by toxic chemicals. However, the effects of toxicants on energy storage as it impacts certain life-history traits have rarely been investigated. Here, we used the nematode Caenorhabditis elegans as a test species for a chronic exposure to copper (Cu) at EC2…	ecotoxicology; invertebrates; mortality; pesticides	Lab experiment			Celegans; Diploscapter_coronatus; Pristionchus_pacificus; Rhomborhabditis_regina; Aphelenchoides_parietinus; Plectus_acuminatus Plectus_opisthocirculus; Plectus_velox		https://onlinelibrary.wiley.com/doi/pdf/10.1111/ivb.12272
2019	Janina Schenk, Stefan Geisen, Nils Kleinboelting, Walter Traunspurger	Metabarcoding data allow for reliable biomass estimates in the most abundant animals on earth	Metabarcoding and Metagenomics	10.3897/mbmg.3.46704	26	4	Microscopic organisms are the dominant and most diverse organisms on Earth. Nematodes, as part of this microscopic diversity, are by far the most abundant animals and their diversity is equally high. Molecular metabarcoding is often applied to study the diversity of microorganisms, but has yet to become the standard to determine nematode communities. As such, the information metabarcoding provide…	Nematodes; quantification; community analysis; Illumina MiSeq; species diversity	Lab experiment		18	Celegans		https://mbmg.pensoft.net/article/46704/download/pdf/
2019	Benjamin Wilden, Nabil Majdi, Ute Kuhlicke, Thomas R. Neu, Walter Traunspurger	Flatworm mucus as the base of a food web	BMC Ecology	10.1186/s12898-019-0231-2	3	5	Background: By altering their habitats, engineering species can improve their own fitness. However, the effect of this strategy on the fitness of coexisting species or on the structure of the respective food web is poorly understood. In this study, bacteria and bacterivorous nematodes with short (Caenorhabditis elegans) and long (Plectus acuminatus) life cycles were exposed to the mucus secreted …	Ecological engineering; Mucus structure; Confocal microscopy; Aquatic ecology; Niche construction	Lab experiment			Celegans; Plectus_acuminatus		http://link.springer.com/content/pdf/10.1186/s12898-019-0231-2.pdf
2019	Luana Monteiro, Tom Moens, Frederic Lynen, Walter Traunspurger	Effects of the water-soluble fraction of a crude oil on freshwater meiofauna and nematode assemblages	Ecotoxicology and Environmental Safety	10.1016/j.ecoenv.2019.03.083	4	4	Oil water-soluble fractions (WSFs) compounds have low persistence in water; evaporating in a matter of hours to days. Nonetheless, they pose high toxicity to exposed biota. Their effects may be instantaneous or delayed, affecting, respectively, mainly survival vs growth and reproduction. We investigated the effects of crude oil WSFs on freshwater meiobenthos, with a focus on nematode assemblages,…	Oil pollution ; Nematoda; Benthic communities; Direct toxicity; Experiments; Microcosms	Lab experiment	7000	68	Eumonhystera_longicaudatula; Eumonhystera_vulgaris; Monhystera_stagnalis; Semitobrilus_pellucidus		https://api.elsevier.com/content/article/PII:S0147651319303549
2019	Luana Monteiro, Walter Traunspurger, Frederic Lynen, Tom Moens	Effects of the water-soluble fraction of a crude oil on estuarine meiofauna: A microcosm approach	Marine Environmental Research	10.1016/j.marenvres.2019.04.006	5	4	Although soluble hydrocarbons persist for only hours to days in aquatic environments, they potentially pose a high toxicity to aquatic biota. Here we investigate effects of the water-soluble fraction (WSF) of crude oil on estuarine meiofauna, with special focus on nematodes. Copepods and amphipods were the most sensitive taxa, disappearing almost completely within 3 weeks after exposure. In nemat…	Oil pollution; Nematodes ; Copepods; Marine communities; Direct toxicity ; Experiments	Lab experiment	8000	132			https://api.elsevier.com/content/article/PII:S0141113618308304
2019	Nabil Majdi, Walter Traunspurger, Hendrik Fueser, Birgit Gansfort, Pascal Laffaille, Anthony Maire	Effects of a broad range of experimental temperatures on the population growth and body-size of five species of free-living nematodes	Journal of Thermal Biology	10.1016/j.jtherbio.2018.12.010	14	6	The temperature-size rule postulates that the growth rates of ectotherms increase under rising temperatures, while the sizes of these organisms at maturity decrease. However, the upper temperature-tolerance range is also typically represented by a metabolic tipping point after which growth suddenly ceases. Free-living nematodes are important members of ecosystems, but little is known about their …	Plectus; Acrobeloides; Thermal tolerance; Warming; Life history; Body-size distribution	Lab experiment			Plectus_acuminatus; Plectus_velox; Plectus_opisthocirculus; Plectus_aquatilis; Acrobeloides_nanus		https://api.elsevier.com/content/article/PII:S0306456518304315
2019	Bianca Kreuzinger-Janik, Henrike Brüchner- Hüttemann, Walter Traunspurger	Effect of prey size and structural complexity on the functional response in a nematode- nematode system	Scientific Reports	10.1038/s41598-019-42213-x	13	3	The functional response of a predatory nematode and the influence of different prey sizes and habitat structure on the concerning parameters were analyzed. We hypothesized that the handling of small prey would be less time-consuming, whereas feeding on larger prey would be more efficient. Therefore, type II functional response curves were expected for large prey and a trend towards type III curve…		Lab experiment			Prionchulus_muscorum; Celegans		http://www.nature.com/articles/s41598-019-42213-x.pdf
2019	Arne Haegerbaeumer, Marie-Theres Mueller, Hendrik Fueser, Walter Traunspurger	Impacts of Micro- and Nano-Sized Plastic Particles on Benthic Invertebrates: A Literature Review and Gap Analysis	Frontiers in Environmental Science	10.3389/fenvs.2019.00017	102	4	As documented by the numerous publications that have appeared in recent years, plastic pollution of the environment and the effects on the respective ecosystems are currently one of the most intensely discussed issues in environmental science and in society at large. Of special concern are the effects of micro- and nano-sized plastics. A key issue in understanding the fate and potential effects o…	microplastic, nanoplastic, sediment, marine, freshwater, invertebrates, toxicity	Literature review					https://www.frontiersin.org/article/10.3389/fenvs.2019.00017/full
2019	Walter Traunspurger, Benjamin Wilden, Nabil Majdi	An overview of meiofaunal and nematode distribution patterns in lake ecosystems differing in their trophic state	Hydrobiologia	10.1007/s10750-019-04092-1	16	3	In the benthos of lakes, habitat size and structure as well as oxygen or resource availability can affect species distribution at local scales. By contrast, there is little knowledge about the mechanisms that determine the structure of benthic communities at larger scales. Here, we compiled data from the literature (23 studies monitoring 129 sites from 75 lakes located in central and northern Eur…	Biodiversity ; Distribution ; Invertebrates ; Eutrophication ; Biofilm ; Profundal ; Littoral ; Lakes	Literature review					http://link.springer.com/content/pdf/10.1007/s10750-019-04092-1.pdf
2019	Nabil Majdi, Jenny M. Schmid-Araya, Walter Traunspurger	Examining the diet of meiofauna: a critical review of methodologies	Hydrobiologia	10.1007/s10750-019-04150-8	7	3	Meiofaunal organisms are diverse, and so is their diet comprising bacteria, fungi, micro-algae, flagellates, ciliates, and other meiofauna. Studies have inferred diet from correlative evidences, observations of feeding or gut contents. Incubation experiments have also helped to link meiofauna’s role to microbially mediated ecosystem processes, reporting in most cases beneficial effects on microbi…	Meiobenthos; Food-web; Gut content; microscopy; Mass spectrometry; Spectroscopy	Literature review					http://link.springer.com/content/pdf/10.1007/s10750-019-04150-8.pdf
2019	Johan van den Hoogen, Stefan Geisen, Devin Routh, Howard Ferris, Walter Traunspurger, David A. Wardle, Ron G. M. de Goede, Byron J. Adams, Wasim Ahmad, Walter S. Andriuzzi, Richard D. Bardgett, Michael Bonkowski, Raquel Campos-Herrera, Juvenil E. Cares, Tancredi Caruso, Larissa de Brito Caixeta, Xiaoyun Chen, Sofia R. Costa, Rachel Creamer, José Mauro da Cunha Castro, Marie Dam, Djibril Djigal, M…	Soil nematode abundance and functional group composition at a global scale	Nature	10.1038/s41586-019-1418-6	311	50	Soil organisms are a crucial part of the terrestrial biosphere. Despite their importance for ecosystem functioning, few quantitative, spatially explicit models of the active belowground community currently exist. In particular, nematodes are the most abundant animals on Earth, filling all trophic levels in the soil food web. Here we use 6,759 georeferenced samples to generate a mechanistic unders…		Literature review				Global	http://www.nature.com/articles/s41586-019-1418-6.pdf
2020	Nabil Majdi, Jana Uthoff, Walter Traunspurger, Pascal Laffaille, Anthony Maire	Effect of water warming on the structure of biofilm-dwelling communities	Ecological Indicators	10.1016/j.ecolind.2020.106622	3	5	Water warming, either resulting from global or local drivers, is of growing concern for aquatic environments. Changes in thermal regimes may alter the functioning and the trophic dynamics of river ecosystems as most aquatic biota like micro-algae, invertebrates, or fish are poikilotherms. Because biofilms integrate basal and intermediate components of aquatic food webs, examination of their respo…	Meiofauna; Warming; Freshwater; Community ecology; Species distribution	Field experiment	2000	21	Monhystrella_paramacrura; Eumonhystera_vulgaris; Chromadorina_bioculata	France	https://api.elsevier.com/content/article/PII:S1470160X20305598
2020	Janina Schenk, Nils Kleinbölting, Walter Traunspurger	Comparison of morphological, DNA barcoding, and metabarcoding characterizations of freshwater nematode communities	Ecology and Evolution	10.1002/ece3.6104	6	3	Biomonitoring approaches and investigations of many ecological questions require assessments of the biodiversity of a given habitat. Small organisms, ranging from protozoans to metazoans, are of great ecological importance and comprise a major share of the planet's biodiversity but they are extremely difficult to identify, due to their minute body sizes and indistinct structures. Thus, most biodi…	diversity; metazoan; molecular species identification; taxonomic assignment	Field experiment	485	22	Theristus_agilis; Anaplectus_grandepapillatus; Chromadorita_leuckartii	Germany	https://api.wiley.com/onlinelibrary/tdm/v1/articles/10.1002%2Fece3.6104
2020	S. Höss, I. Roessink, T.C.M. Brock, W. Traunspurger	Response of a nematode community to the fungicide fludioxonil in sediments of outdoor freshwater microcosms compared to a single species toxicity test	Science of The Total Environment	10.1016/j.scitotenv.2019.135627	4	4	When entering aquatic ecosystems, hydrophobic organic chemicals like the fungicide fludioxonil partition to the sediment compartment where they pose potential risks to benthic invertebrates. To assess the ecological risk for sediment-dwelling invertebrates, nematodes are a suitable organism group, as they are abundantly present and possess key positions in the benthic food web. Therefore, the tox…	Fludioxonil; Outdoor microcosms; Spiked sediment; nematodes; Caenorhabditis elegans	Field experiment	4658	24	Celegans; Eumonhystera_filiformis	The Netherlands	https://api.elsevier.com/content/article/PII:S0048969719356220
2020	Maria Alexandra Bighiu, Sebastian Höss, Walter Traunspurger, Maria Kahlert, Willem Goedkoop	Limited effects of pesticides on stream macroinvertebrates, biofilm nematodes, and algae in intensive agricultural landscapes in Sweden	Water Research	10.1016/j.watres.2020.115640	11	5	Pesticides are frequently detected in surface waters, sometimes at levels exceeding ecotoxicological guidelines. We screened for almost 100 pesticides in 32 streams from intense agricultural areas in Southern Sweden, in concert with water chemistry parameters. In addition, we investigated the com- munities of benthic macroinvertebrates, biofilm nematodes and algae and calculated multiple bio- ass…	Biological metrics; Mixtures; Eutrophication; Multiple stressors; Ecological status assessment	Field survey	5148	78		Sweden	https://api.elsevier.com/content/article/PII:S0043135420301767
2020	Christoph Ptatscheck, Birgit Gansfort, Nabil Majdi, Walter Traunspurger	The influence of environmental and spatial factors on benthic invertebrate metacommunities differing in size and dispersal mode	Aquatic Ecology	10.1007/s10452-020-09752-2	10	4	Abstract: Understanding the drivers of species distribution is an important topic in conservation biology and ecology, pertaining to species traits like dispersal strategies and species–environment interactions. Here we examined the drivers of benthic species distribution at 20 sections of a second-order stream network. Environmental and spatial factors and the dispersal modes of the organisms we…	Meiobenthos; _x0002_ Macrobenthos; _x0002_ Nematodes; _x0002_ Environmental factors	Field survey	893	73	Eumonistera_filiformis	Germany	http://link.springer.com/content/pdf/10.1007/s10452-020-09752-2.pdf
2020	Henrike Brüchner-Hüttemann, Walter Traunspurger	Seasonal distribution of abundance, biomass and secondary production of free-living nematodes and their community composition in different stream micro-habitats	Nematology	10.1163/15685411-00003313	2	2	Summary: The nematode communities of four different micro-habitats in an unpolluted first-order stream were investigated over a 13-month period in a study of the sediment and the biofilms on dead wood, macrophytes and leaf litter. Nematode abundances, biomass and secondary production were analysed, together with the species composition, proportion of feeding types and diversity of the nematode co…	dead wood; deposit feeders; feeding types; leaf litter; macrophytes; micro-habitats; sediment	Field survey	4435	108	Theristus_agilis; Eumonhystera_vulgaris; Eumonhystera_pseudobulbosa	Germany	https://brill.com/view/journals/nemy/22/4/article-p401_4.xml
2020	Janina Schenk, Sebastian Höss, Marvin Brinke, Nils Kleinbölting, Henrike Brüchner-Hüttemann, Walter Traunspurger	Nematodes as bioindicators of polluted sediments using metabarcoding and microscopic taxonomy	Environment International	10.1016/j.envint.2020.105922	12	6	The use of bioindicator species is a widely applied approach to evaluate ecological conditions, and several indices have been designed for this purpose. To assess the impact of pollution, especially in sediments, a pollution-sensitive index based on nematodes, one of the most abundant and species-rich groups of metazoa, was developed. The NemaSPEAR[%] index in its original form relies on the morp…	Nemaspear; Biomonitoring; sediment quality; high throughput sequencing; innovative monitoring	Field survey	3496	123		Germany	https://api.elsevier.com/content/article/PII:S0160412020318778
2020	Janina Schenk, Sebastian Höss, Marvin Brinke, Nils Kleinbölting, Henrike Brüchner-Hüttemann, Walter Traunspurger	Dataset supporting the use of nematodes as bioindicators of polluted sediments	Data in Brief	10.1016/j.dib.2020.106087	1	6	We provide the dataset supporting the research article ÒNematodes as bioindicators of polluted sediments using metabarcoding and microscopic taxonomyÓ [1]. Nematodes are frequently used as bioindicators and the NemaSPEAR[%] is an validated index that is originally based on morphological data. The index was compared to molecular sequence data for the 28S rDNA, 18S rDNA and COI gene for 7 locations…	Bioindicator; Nemaspear; Polluted sediments; Nematodes	Field survey				Germany	https://api.elsevier.com/content/article/PII:S2352340920309811
2020	Henrike Brüchner-Hüttemann, Christoph Ptatscheck, Walter Traunspurger	Meiofauna in stream habitats: temporal dynamics of abundance, biomass and secondary production in different substrate microhabitats in a first-order stream	Aquatic Ecology	10.1007/s10452-020-09795-5	2	3	Abstract: Meiofaunal abundance, biomass and secondary production were investigated over 13 months in an unpolluted first-order stream. Four microhabitats were considered: sediment and the biofilms on dead wood, macrophytes and leaf litter. The relative contribution of the microhabitats to secondary production and the influence of environmental factors on meiofaunal density distribution were estim…	Sediment; _x0002_ Dead wood; _x0002_ Macrophytes; _x0002_ Leaf litter; _x0002_ Seasonal pattern	Field survey				Germany	https://link.springer.com/content/pdf/10.1007/s10452-020-09795-5.pdf
2020	Benjamin Wilden, Orhideja Tasevska, Walter Traunspurger	A comparison of benthic meiofaunal communities in the oldest European lake	Journal of Great Lakes Research	10.1016/j.jglr.2020.01.018	3	3	Lake Ohrid is the oldest lake in Europe and one of the oldest lakes in the world, but the inventory of its meiofauna is still fragmentary. We studied the benthic meiofaunal communities in the sediment and hard substrates of the lake’s littoral and profundal sediments. Periphyton on hard substrates was sampled using a brush sampler, and sediment was obtained using a gravity corer at depths of 2 m …	meiofauna; community composition: benthic rotifers; free-living nematodes; ancient Lake Ohrid; seasonality	Field survey				Republic of North Macedonia	https://api.elsevier.com/content/article/PII:S0380133020300344
2020	Nabil Majdi, Miriam Colls, Linette Weiss, Vicenç Acuña, Sergi Sabater, Walter Traunspurger	Duration and frequency of non‐flow periods affect the abundance and diversity of stream meiofauna	Freshwater Biology	10.1111/fwb.13587	4	6	Intermittent streams (IS) comprise a large proportion of the drainage network in many parts of the world. The non-flow period of IS are known to impact stream biota because aquatic habitats dry out. However, less well understood are the relative effects of the temporal component of these drying events including their duration and frequency. Here, we characterised effects of temporal component of …	Community structure; Ephemeral streams; Functional diversity; Meiobenthos; Species distribution	Field survey	2624	113	Monhystrella_paramacrura	Spain	https://api.wiley.com/onlinelibrary/tdm/v1/articles/10.1111%2Ffwb.13587
2020	Hendrik Fueser, Marie-Theres Mueller, Walter Traunspurger	Rapid ingestion and egestion of spherical microplastics by bacteria-feeding nematodes	Chemosphere	10.1016/j.chemosphere.2020.128162	12	3	Microplastics, anthropogenically released into freshwaters, settle in sediments, where they are directly ingested by benthic organisms. However, to the best of our knowledge, fine-scale studies of microplastic ingestion and egestion by nematodes, one of the most abundant meiofaunal taxa, are lacking. We therefore conducted a time series of the ingestion and egestion by adult Caenorhabditis elegan…	Time series; Bioaccumulation; Body burden; Pumping rate; Caenorhabditis elegans; Pristionchus pacificus	Lab experiment			Celegans; Pristionchus_pacificus		https://api.elsevier.com/content/article/PII:S0045653520323572
2020	Hendrik Fueser, Marie-Theres Mueller, Walter Traunspurger	Ingestion of microplastics by meiobenthic communities in small-scale microcosm experiments	Science of The Total Environment	10.1016/j.scitotenv.2020.141276	17	3	Microplastics have been detected in many different environments. Nematodes are a rife meiofaunal taxon and occupy an important trophic position in benthic food webs. Laboratory-based ingestion experiments have demonstrated the susceptibility of single nematode species to microplastic uptake. However, the determinants of ingestion by meiofaunal assemblages, especially those of nematodes, have yet …	Polystyrene bead; Chironomid; Copepod; Rotifer; Nematode; Sediment	Lab experiment	2496	97	Eumonhystera_filiformis; Tobrilus_gracilis; Dorylaimus_stagnalis; Mononchus_tunbrigensis		https://api.elsevier.com/content/article/PII:S0048969720348051
2020	C. Ptatscheck, S. Gehner, W. Traunspurger	Should we redefine meiofaunal organisms? The impact of mesh size on collection of meiofauna with special regard to nematodes	Aquatic Ecology	10.1007/s10452-020-09798-2	4	3	Abstract: Meiofaunal organisms are the predominant metazoans in benthic systems and important members of the benthic food web. They are defined by mesh size and specifically by their retention on a sieve with a 44-µm mesh size. In this study, we examined the accuracy of this standard collection method by counting the number of meiobenthic individuals, life stages and nematode species in a sample.…	Benthos; _x0002_ Nematodes; _x0002_ Diversity;_x0002_ Species composition; _x0002_ Age structure; _x0002_ Mesh size	Lab experiment	4202	75	Eumonhystera_vulgaris; Eumonhystera_pseudobulbosa		https://link.springer.com/content/pdf/10.1007/s10452-020-09798-2.pdf
2020	Marie-Theres Mueller, Hendrik Fueser, Sebastian Höss, Walter Traunspurger	Species-specific effects of long-term microplastic exposure on the population growth of nematodes, with a focus on microplastic ingestion	Ecological Indicators	10.1016/j.ecolind.2020.106698	21	4	Microplastics (MPs; < 5 mm) released into freshwaters undergo changes in their density that make them highly bioavailable to the fauna in the sediments. In fine sediments, nematodes account for up to 90% of the meiobenthic organisms and have an important position in benthic food webs, by connecting lower (bacteria) and higher (e.g., macrofauna, fish) trophic levels. Due to their high ecological r…	Polystyrene beads, Population growth rate, Carrying capacity, Maximum sustainable yield, Doubling time, Microspheres	Lab experiment					https://api.elsevier.com/content/article/PII:S1470160X2030635X
2020	Marie-Theres Mueller, Hendrik Fueser, Lam Ngoc Trac, Philipp Mayer, Walter Traunspurger, Sebastian Höss	Surface-Related Toxicity of Polystyrene Beads to Nematodes and the Role of Food Availability	Environmental Science and Technology	10.1021/acs.est.9b06583	50	6	Microplastics released into freshwaters from anthropogenic sources settle in the sediments, where they may pose an environmental threat to benthic organisms. However, few studies have considered the ecotoxicological hazard of microplastic particles for nematodes, one of the most abundant taxa of the benthic meiofauna. This study investigated the toxic effects of polystyrene (PS) beads (0.1−10.0 μ…		Lab experiment					https://pubs.acs.org/doi/pdf/10.1021/acs.est.9b06583
2020	Julie Neury-Ormanni, Caroline Doose, Nabil Majdi, Jacky Vedrenne, Walter Traunspurger, Soizic Morin	Selective grazing behaviour of chironomids on microalgae under pesticide pressure	Science of The Total Environment	10.1016/j.scitotenv.2020.138673	4	6	The herbicide diuron and the insecticide imidacloprid are amongst the most frequently detected pesticides in French rivers, and each is known to affect many aquatic organisms. However, the question of whether and how both pesticides together might induce multi-stress conditions, which could induce indirect effects such as the modification of biological interactions within freshwater microbial com…	Trophic relation; Ecotoxicology; Pesticide mixture; Grazer	Lab experiment					https://api.elsevier.com/content/article/PII:S0048969720321902
2020	Johan van den Hoogen, Stefan Geisen, Diana H. Wall, David A. Wardle, Walter Traunspurger, Ron G. M. de Goede, Byron J. Adams, Wasim Ahmad, Howard Ferris, Richard D. Bardgett, Michael Bonkowski, Raquel Campos-Herrera, Juvenil E. Cares, Tancredi Caruso, Larissa de Brito Caixeta, Xiaoyun Chen, Sofia R. Costa, Rachel Creamer, José Mauro da Cunha e Castro, Marie Dam, Djibril Djigal, Miguel Escuer, Bry…	A global database of soil nematode abundance and functional group composition	Scientific Data	10.1038/s41597-020-0437-3	21	50	Abstract: As the most abundant animals on earth, nematodes are a dominant component of the soil community. They play critical roles in regulating biogeochemical cycles and vegetation dynamics within and across landscapes and are an indicator of soil biological activity. Here, we present a comprehensive global dataset of soil nematode abundance and functional group composition. This dataset includ…		Lab experiment; Field survey			Eumonhystera_filiformis	Global	http://www.nature.com/articles/s41597-020-0437-3.pdf
2020	Jenny M. Schmid-Araya, Peter E. Schmid, Nabil Majdi, Walter Traunspurger	Biomass and production of freshwater meiofauna: a review and a new allometric model	Hydrobiologia	10.1007/s10750-020-04261-7	13	4	Freshwater meiofauna occupies a central role in stream food webs, not always as intermediary but also as top consumers. Consequently, the meiofauna’s transient dynamical patterns and turnover are vital to understand its contribution to the overall production and energy flow within benthic freshwater systems. Here, we revise the current methodological procedures used to estimate production in bent…	Production; Meiofauna; Annual P/B; Biomass; Allometric model	Literature review					https://link.springer.com/content/pdf/10.1007/s10750-020-04261-7.pdf
2020	Christoph Ptatscheck, Henrike Brüchner-Hüttemann, Bianca Kreuzinger-Janik, Sebastian Weber, Walter Traunspurger	Are meiofauna a standard meal for macroinvertebrates and juvenile fish?	Hydrobiologia	10.1007/s10750-020-04189-y	13	5	Abstract: Due to the lack of empirical data, meiofauna are often underestimated as prey for freshwater animals and are commonly regarded as trophic dead ends. Here we present a synthesis of recent evidence showing that meiofauna are significant as prey, not only for many benthic macroinvertebrates (chironomids, shrimps, and flatworms) but also for juveniles of widespread freshwater bottom-feeding…	Functional response; _x0002_ Predator prey interaction; _x0002_ Benthic food web; _x0002_ Macrofauna diet; _x0002_ Nematodes	Literature review					http://link.springer.com/content/pdf/10.1007/s10750-020-04189-y.pdf
2020	Nabil Majdi, Jenny M. Schmid-Araya, Walter Traunspurger	Preface: Patterns and processes of meiofauna in freshwater ecosystems	Hydrobiologia	10.1007/s10750-020-04301-2	5	3	Never heard of harpacticoids, ostracods, gastrotrichs or microturbellarians? This is no surprise, they are so tiny! Yet these taxa and many others more famous (nematodes, rotifers, or tardigrades) show complex behaviours and extraordinary physiologies that allow them to colonize inland waters worldwide. This exuberant fauna is better known as the meiofauna (or meiobenthos). Meiofaunal organisms h…	Invertebrates; Distribution; Body size; Trophic interactions; Meiobenthos	Literature review					https://link.springer.com/content/pdf/10.1007/s10750-020-04301-2.pdf
2020	Christoph Ptatscheck, Walter Traunspurger	The ability to get everywhere: dispersal modes of free-living, aquatic nematodes	Hydrobiologia	10.1007/s10750-020-04373-0	8	2	Abstract: Nematodes colonize almost all aquatic habitats worldwide. Despite their small size, restricted locomotion and lack of pelagic larvae, they can reach even isolated habitats within a short time. In this review, we examine the underlying dispersal modes, considering their active movement in substrates and water, their drift by water and wind, rafting, zoochory as well as human-mediated vec…	Meiofauna paradox; _x0002_ Rafting; _x0002_ Zoochory; _x0002_ Drifting; _x0002_ Wind dispersal; _x0002_ Locomotion	Literature review					https://link.springer.com/content/pdf/10.1007/s10750-020-04373-0.pdf
2020	Walter Traunspurger, André Witthöft-Mühlmann, Sebastian Höss	Free-living nematode communities in a large and deep oligotrophic lake in Europe: comparison of different depth zones of Lake Constance (Germany)	Nematology	10.1163/15685411-bja10030	2	3	Summary: This study investigated the abundance, biomass, species richness, species distribution and feeding types of free-living nematodes in Lake Constance, a deep, oligotrophic lake in Germany. Three water depth zones, the sublittoral (13-30 m water depth), profundal (31-99 m) and deep profundal (100-250 m), were distinguished and 16 sites from each water depth zone were sampled. A high nematod…		Field survey		78		Germany	https://brill.com/view/journals/nemy/23/1/article-p69_6.xml
2021	Henrike Brüchner-Hüttemann, Sebastian Höss, Christoph Ptatscheck, Marvin Brinke, Janina Schenk, Walter Traunspurger	Added value of the NemaSPEAR[%]-index to routinely used macrofauna-based indices for assessing the quality of freshwater sediments	Ecological Indicators	10.1016/j.ecolind.2020.107015	3	6	Abstract: Assessments of the ecological status of freshwater ecosystems, such as mandated by the EU Water Framework Directive, are routinely conducted by monitoring macroinvertebrates. However, for the quality assessment of fine sediments, macroinvertebrates are of limited suitability. In such habitats they show a low species diversity and often low densities, whereas a more diverse meiofauna can…	Macrofauna; Meiofauna; Nematodes; Bioindicator; Sediment quality; Stream	Field survey	7435	147		Germany	https://api.elsevier.com/content/article/PII:S1470160X20309547
2021	Benjamin Wilden, Walter Traunspurger, Stefan Geisen	Inventory of the benthic eukaryotic diversity in the oldest European lake	Ecology and Evolution	10.1002/ece3.7907	0	3	We have profound knowledge on biodiversity on Earth including plants and animals. In the recent decade, we have also increased our understanding on microorganisms in different hosts and the environment. However, biodiversity is not equally well studied among different biodiversity groups and Earth´s systems with eukaryotes in freshwater sediments being among the least known. In this study, we use…	eDNA; benthic eukaryotes; functional diversity; ancient lake	Field survey				Republic of North Macedonia	https://onlinelibrary.wiley.com/doi/pdf/10.1002/ece3.7907
2021	Bianca Kreuzinger-Janik, Nabil Majdi, Walter Traunspurger	Distribution and diversity of meiofauna along an aquatic-terrestrial moss ecotone	Nematology	10.1163/15685411-bja10070	1	3	This study provides first insights into the moss-dwelling meio-invertebrate community inhabiting mosses collected from underwater, splash-water and adjacent terrestrial habitats along a Swedish lake. Additionally, changes in both species and functional diversity of the nematode community were followed. Total meio-invertebrate mean densities and biomass peaked at 10 644.2 ± 2391.8 individuals (g d…	biomass; bryophyte; community structure; feeding types; forest; freshwater ecology; lake; nematodes; Sweden	Field survey	3000	74	Punctodora_ratzeburgensis; Eumonhystera; Plectus: Prionchulus_muscorum	Sweden	https://brill.com/view/journals/nemy/23/6/article-p695_8.xml
2021	Marie-Theres Rauchschwalbe, Hendrik Fueser, Walter Traunspurger, Sebastian Höss	Bacterial consumption by nematodes is disturbed by the presence of polystyrene beads: The roles of food dilution and pharyngeal pumping	Environmental Pollution	10.1016/j.envpol.2021.116471	9	4	Microplastics (MPs; <5 mm) released into freshwaters from anthropogenic sources accumulate in sediments, where they may pose an environmental threat to benthic organisms, such as nematodes. Several studies have examined the effects of nano- and microplastics on the nematode Caenorhabditis elegans, whereas reduced food availability was suggested as a possible explanation for the observed inhibitor…	Caenorhabditis elegans, Microplastics Silica , Feeding reduction, Feeding efficiency	Lab experiment			Celegans		https://api.elsevier.com/content/article/PII:S026974912100049X
2021	Hendrik Fueser, Marie-Theres Rauchschwalbe, Sebastian Höss, Walter Traunspurger	Food bacteria and synthetic microparticles of similar size influence pharyngeal pumping of Caenorhabditis elegans	Aquatic Toxicology	10.1016/j.aquatox.2021.105827	2	4	Toxicity tests using the model organism Caenorhabditis elegans have shown that exposure to small microplastics such as polystyrene (PS) beads lead to high body burdens and dietary restrictions that in turn inhibit reproduction. Pharyngeal pumping is the key mechanism of C. elegans for governing the uptake of food and other particles and can be easily monitored by determining the pumping rates. In…	Polystyrene beads; Microspheres; Pumping rate; Microplastics; Escherichia coli; Nematodes	Lab experiment			Celegans		https://api.elsevier.com/content/article/PII:S0166445X21000862
2021	Sebastian Höss, Nicola Reiff, Walter Traunspurger, Johannes Helder	On the balance between practical relevance and standardization - Testing the effects of zinc and pyrene on native nematode communities in soil microcosms	Science of The Total Environment	10.1016/j.scitotenv.2021.147742	1	4	Soils are among the most densely inhabited and biodiverse habitats on our planet, and many important soil ecosystem services depend on the health condition of the native soil fauna. Anthropogenic stress such as chemical pollution acting on the native soil fauna might jeopardize these functions. Laboratory microcosm tests are an ap- propriate tool for assessing the risk of chemicals on the native …	soil microcosms; nematodes; intermediate tier test; zinc; pyrene	Lab experiment	6389	78	Acrobeles; Alaimus; Anaplectus; Aporcelaimellus; Coslenchus; Telotylenchidae; Cephalobus; Cervidellus; Chiloplacus; Eucephalobus;		https://api.elsevier.com/content/article/PII:S0048969721028138
2021	Birgit Gansfort, Jana Uthoff, Walter Traunspurger	Connectivity of communities interacts with regional heterogeneity in driving species diversity: a mesocosm experiment	Ecosphere	10.1002/ecs2.3749	1	3	According to metacommunity theory and previous experiments, inter-patch dispersal rates may alter species diversity at local to regional scales. In this study, we tested the predictions of metacommunity theory regarding the effect of dispersal rates on diversity, with a focus on the impact of environmental heterogeneity. Experiments were conducted in which the dispersal frequencies of freshwater …	dispersal; mass effects; metacommunity; nematodes; temperature effects	Lab experiment	5283	35	Tripyla_glomerans; Daptonema_dubium; Dorylaimus_stagnalis		https://onlinelibrary.wiley.com/doi/pdf/10.1002/ecs2.3749
2022	Janina Schenk, Sebastian Höss, Nils Kleinbölting, Walter Traunspurger	Suitability of molecular taxonomy for assessing polluted sediments using the NemaSPEAR[%] index	Ecological Indicators	10.1016/j.ecolind.2022.108761	0	4	Assessing the ecological consequences of marine and freshwater contamination is an important use of biological indicators. The NemaSPEAR[%] index is a nematode-based index for the evaluation of sediment quality and an expedient complement to macroinvertebrate-based indicator systems, especially for fine, cohesive sediments. While the NemaSPEAR[%] index in its original form is morphologically base…	Bioindicators; Biomonitoring; Nematodes; Metabarcoding; Morphological taxonomy; Sediment quality	Field survey	5778	188	Eumonhystera_filiformis; Monhystera_stagnalis; Tobrilus_gracilis; Eumonhystera_vulgaris; Semitobrilus_pellucidus	Germany	https://api.elsevier.com/content/article/PII:S1470160X22002321
2022	Nabil Majdi, Lizaan de Necker, Hendrika Fourie, Ané Loggenberg, Edward C. Netherlands, Jasmine Bunte-Tschikin, Walter Traunspurger, Gerhard C. du Preez	Diversity and distribution of benthic invertebrates dwelling rivers of the Kruger National Park, South Africa	Koedoe				Meiobenthos (or meiofauna) are microscopic invertebrates that inhabit biofilms and interstitial spaces in rivers. They are diverse and extremely abundant, and they perform essential ecological functions by linking microbial production to higher trophic levels (e.g. macrobenthic invertebrates and fishes). However, meiobenthic communities remain poorly studied in Africa. Here, we sampled meio- and …	biodiversity; aquatic ecology; community structure; meiofauna; macrofauna; invasive species; pollution	Field survey				South Africa
2022	Bianca Kreuzinger-Janik, Walter Traunspurger, Nabil Majdi	Who feeds on whom in semi-aquatic moss ecosystems?	Food Webs	10.1016/j.fooweb.2022.e00237	0	3	Moss patches growing at the interface between terrestrial and limnic ecosystems (in the splash-water zone) are colonized by terrestrial, semi-aquatic, and aquatic animals. Besides being a refuge, mosses provide food resources, such as micro-algae, particulate organic matter, and moss tissues themselves. In this study, the standing stocks and isotopic signatures of both resources and consumers wer…	Stable isotopes; Community ecology; Food web; Trophic niche; Meiofauna	Field survey				Sweden	https://api.elsevier.com/content/article/PII:S2352249622000192
2022	Hendrik Fueser, Christian Pilger, Cihang Kong, Thomas Huser, Walter Traunspurger	Polystyrene microbeads influence lipid storage distribution in C. elegans as revealed by coherent anti-Stokes Raman scattering (CARS) microscopy	Environmental Pollution	10.1016/j.envpol.2021.118662	0	5	The exposure of Caenorhabditis elegans to polystyrene (PS) beads of a wide range of sizes impedes feeding, by reducing food consumption, and has been linked to inhibitory effects on the reproductive capacity of this nematode, as determined in standardized toxicity tests. Lipid storage provides energy for longevity, growth, and reproduction and may influence the organismal response to stress, incl…	Polystyrene beads; Microspheres; Microplastics; Nematodes; Food dilution; Coherent anti-Stokes Raman scattering (CARS)	Lab experiment			Celegans		https://api.elsevier.com/content/article/PII:S0269749121022442
2022	Sebastian Höss, Marie-Theres Rauchschwalbe, Hendrik Fueser, Walter Traunspurger	Food availability is crucial for effects of 1-μm polystyrene beads on the nematode Caenorhabditis elegans in freshwater sediments	Chemosphere	10.1016/j.chemosphere.2022.134101	1	4	Freshwater sediments represent a sink for microplastic (<5 mm) through various processes. Thus, benthic or- ganisms can be exposed to relatively high concentrations of microplastics. Surprisingly, studies on benthic or- ganisms are still underrepresented in the field of ecotoxicological effect assessment of microplastics. Therefore, we studied the effects of 1-μm polystyrene (PS) beads on the rep…	Microplastic Polystyrene, Sediment, Caenorhabditis elegans, Reproduction, Ingestion	Lab experiment			Celegans		https://api.elsevier.com/content/article/PII:S004565352200594X
2022	Marie-Theres Rauchschwalbe, Sebastian Höss, Arne Haegerbaeumer, Walter Traunspurger	Long-term exposure of a free-living freshwater micro- and meiobenthos community to microplastic mixtures in microcosms	Science of The Total Environment	10.1016/j.scitotenv.2022.154207	0	4	Microplastics in a wide range of shapes and polymer types (MPs; <5 mm) accumulate in freshwater sediments, where they may pose an environmental threat to sediment-dwelling micro- and meiobenthos. To date, the effects of MPs on those organisms have mostly been studied in single-species experiments exposed to high particle concentrations. By contrast, there have been few investigations of the effec…	Community structure, Microplastics, Sediment, Nematodes, Aquatic Meiofauna	Lab experiment	1411	26	Daptonema_dubium		https://api.elsevier.com/content/article/PII:S0048969722012992
